# Supplementary material for: Transcriptional characterization of iPSC-derived microglia as a model for therapeutic development in neurodegeneration
Source: PubMed Central journal article supplement (PMC10810793; doi:10.1038/s41598-024-52311-0), 2024-01-25
Supplement: 41598_2024_52311_MOESM9_ESM.pdf [file 41598_2024_52311_MOESM9_ESM.pdf]

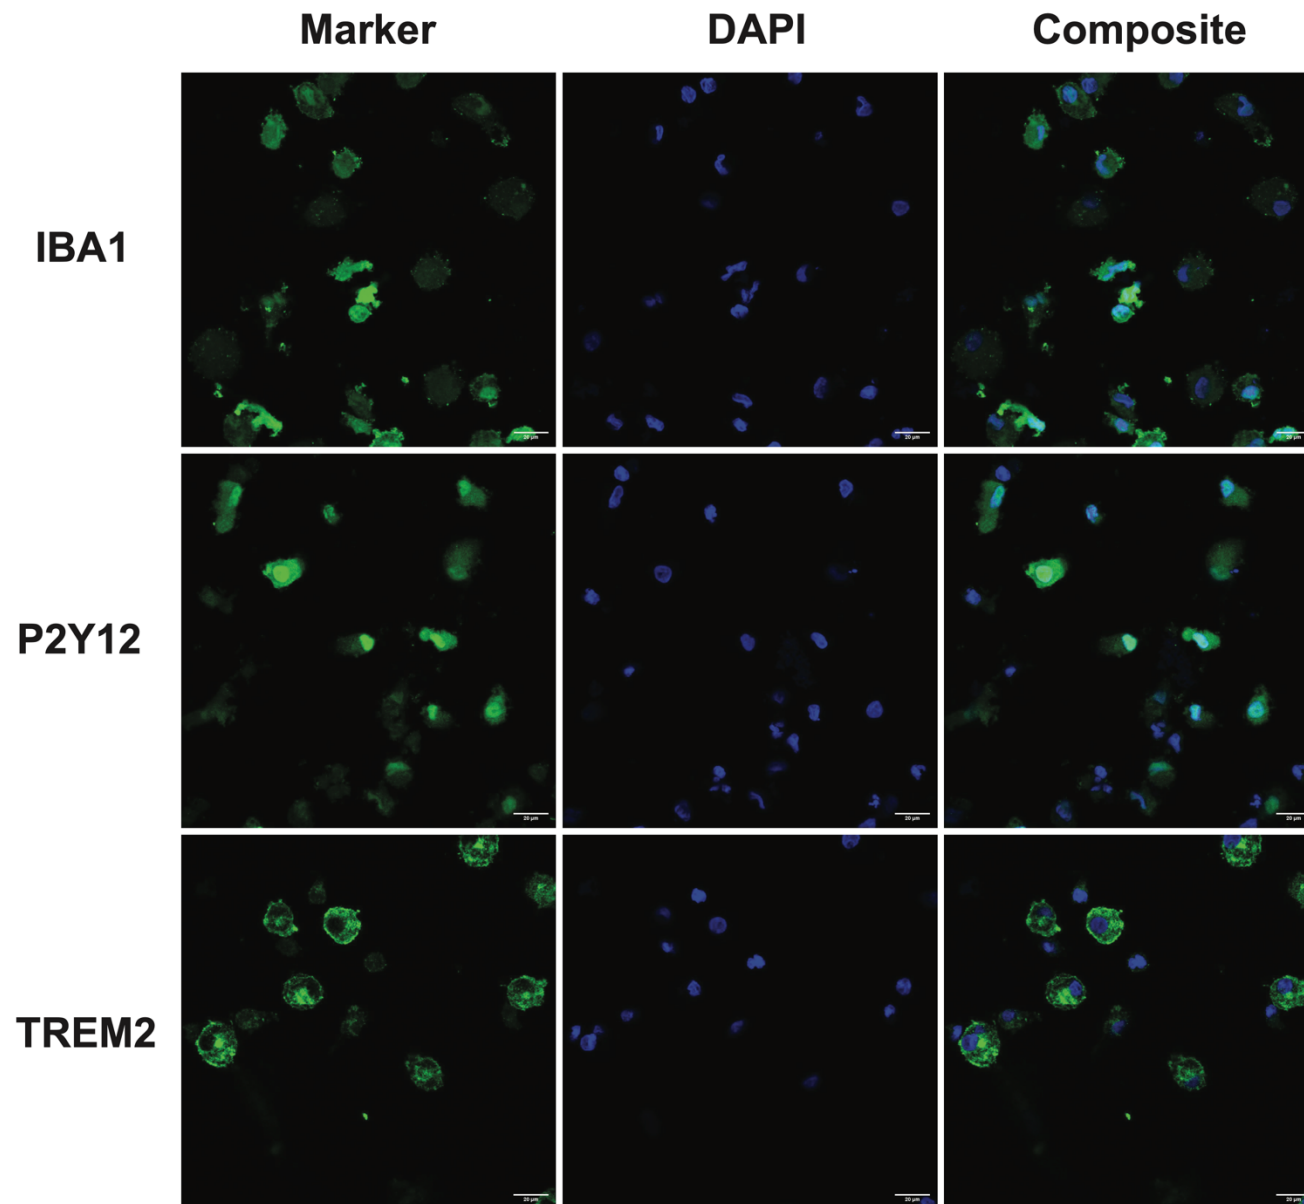

**Supplementary Figure 1.** Individual and composite immunofluorescence images of Commercial iMGL cells stained with *IBA1*, *P2Y12*, or *TREM2* (green) and DAPI (blue). The scale bar represents 20  $\mu\text{m}$ .

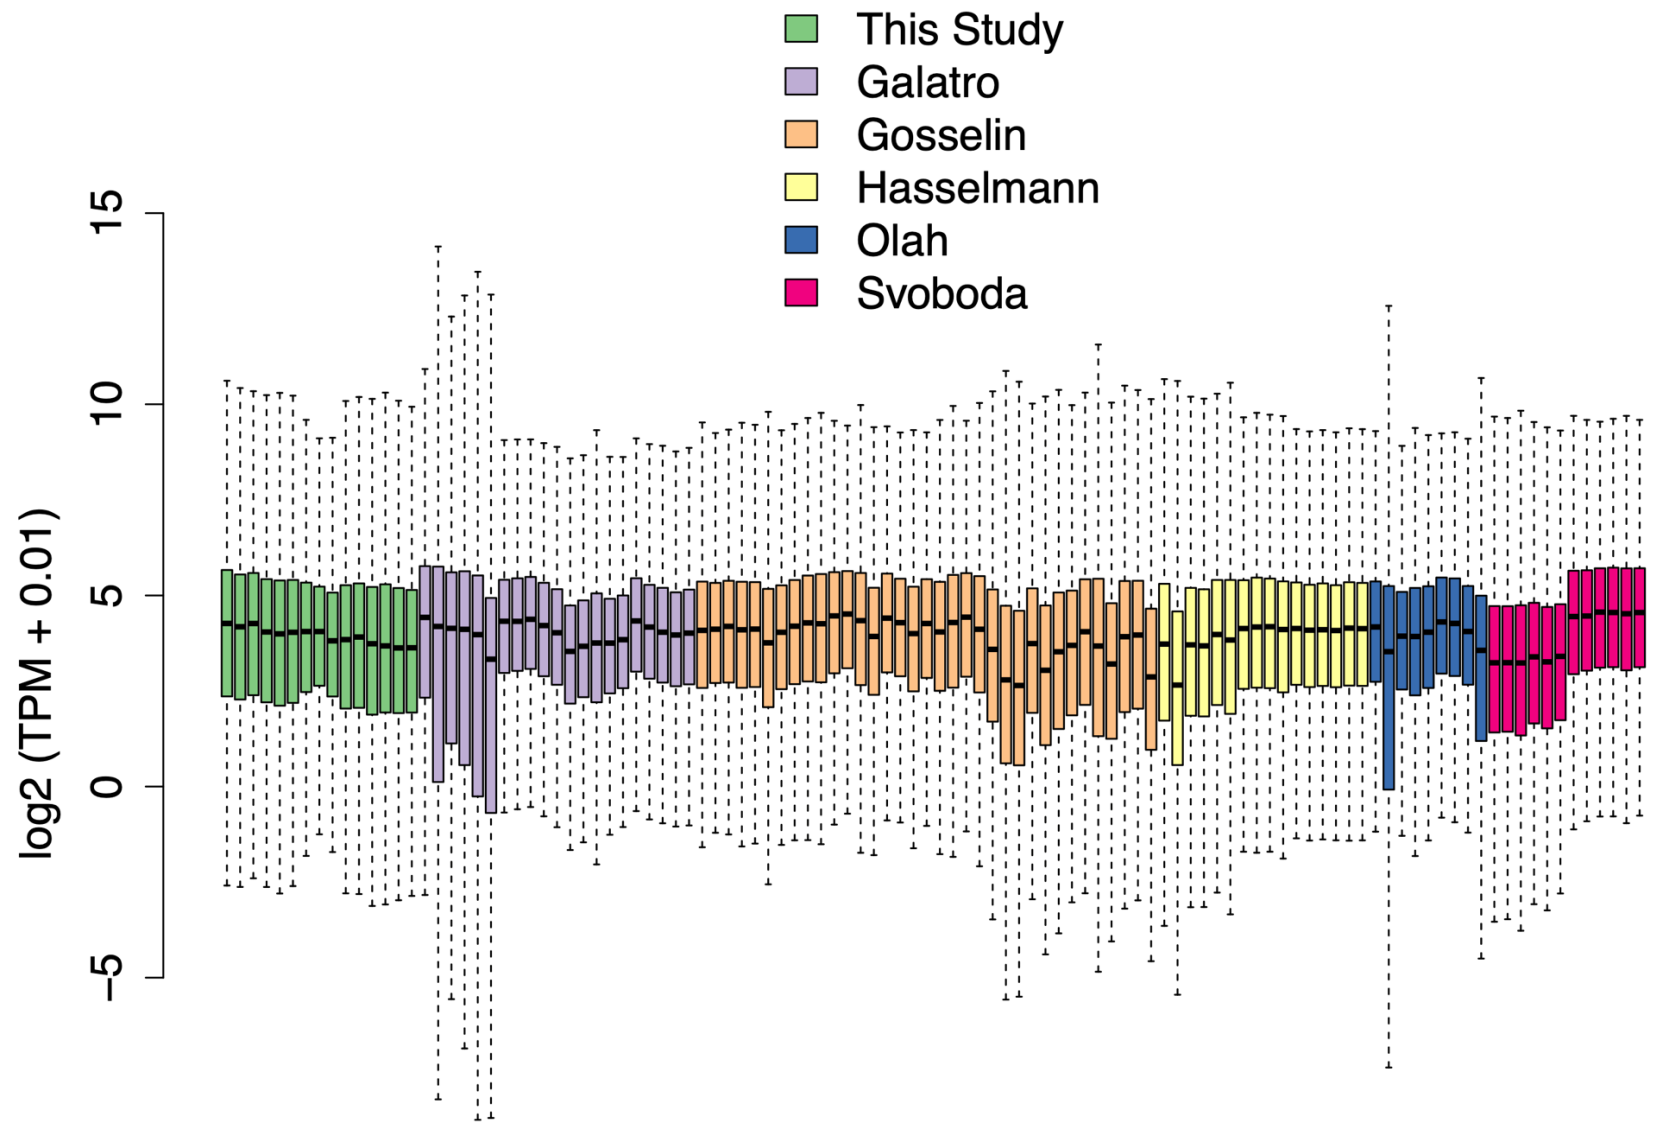

**Supplementary Figure 2.** Distribution of gene expression values for 12,392 expressed genes across the Commercial iMGL time course and external bulk RNA-seq datasets.



**A**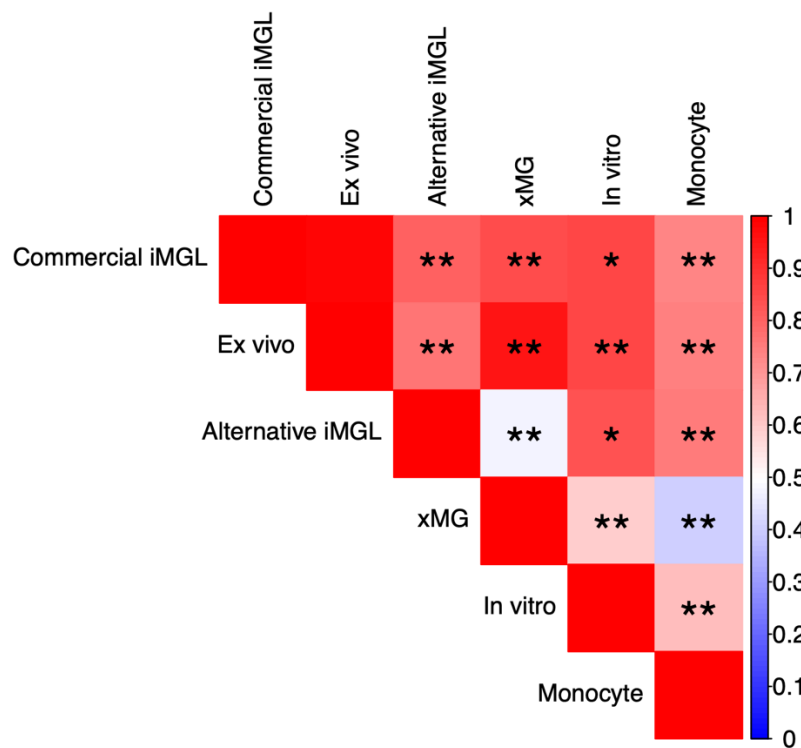**B**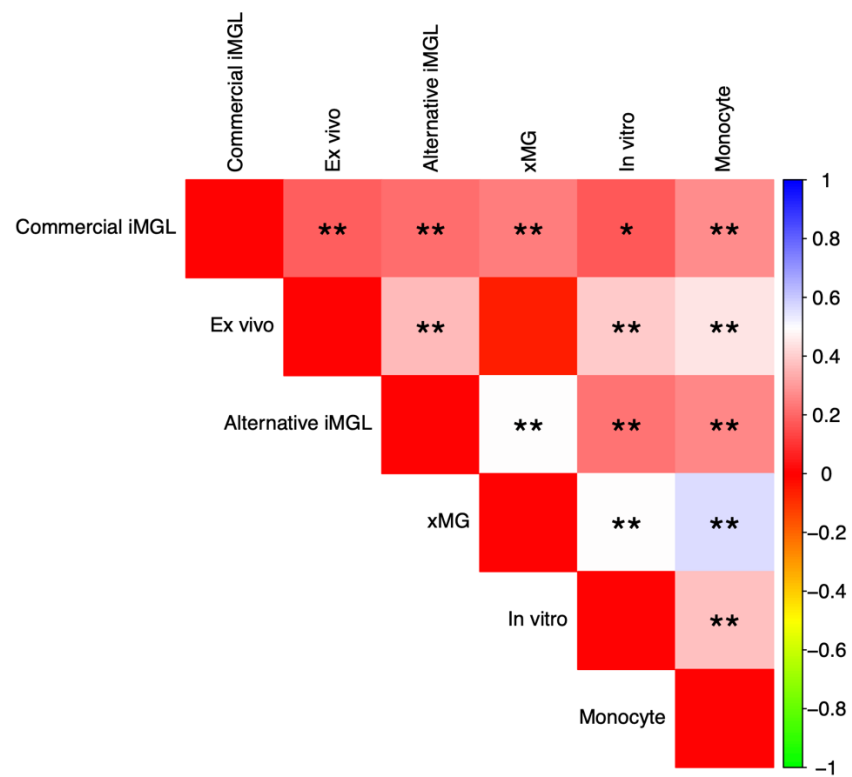

**Supplementary Figure 3. Quantitative PCA comparisons**

**A)** Pairwise Sigclust scores comparing Commercial iMGL samples and microglia comparator datasets using principal component analysis on all expressed genes. Each cell represents a comparison between two cell systems and is colored by the Sigclust score (0 to 1). \* empirical p-value < 0.05, \*\* empirical p-value < 0.01

**B)** Pairwise average Silhouette scores comparing Commercial iMGL samples and microglia comparator datasets using principal component analysis on all expressed genes. Each cell represents a comparison between two cell systems and is colored by the average Silhouette score (-1 to 1). \* empirical p-value < 0.05, \*\* empirical p-value < 0.01

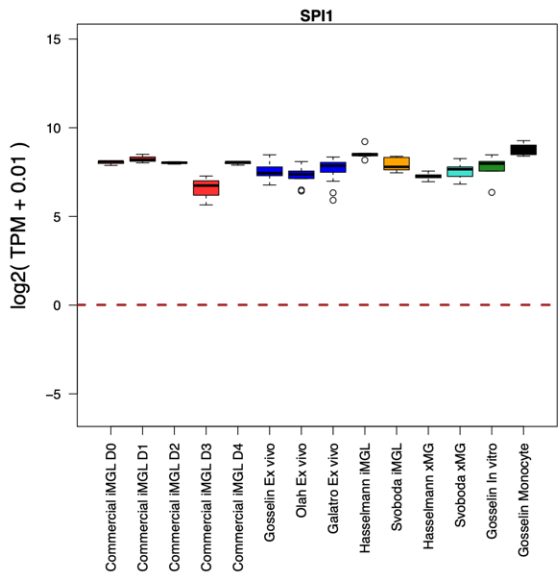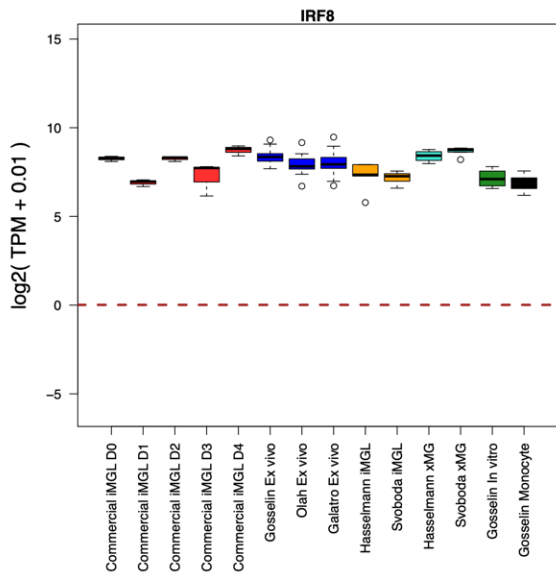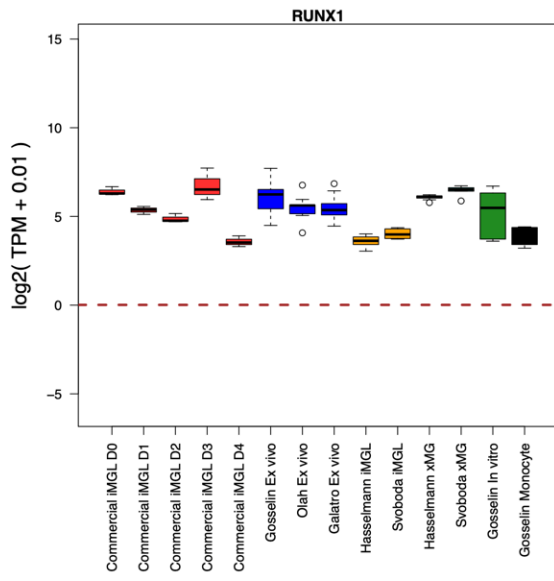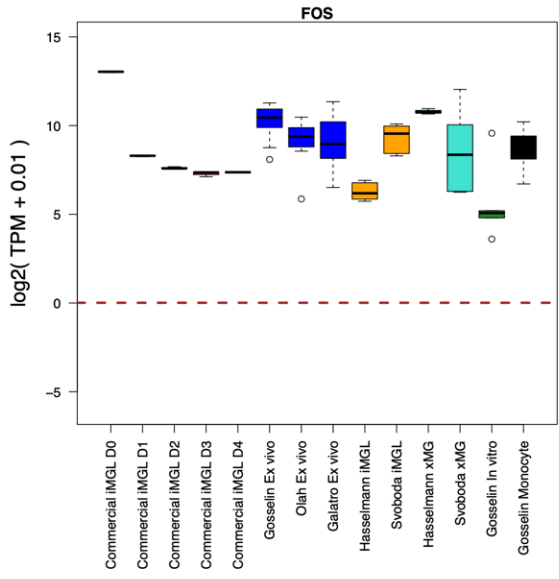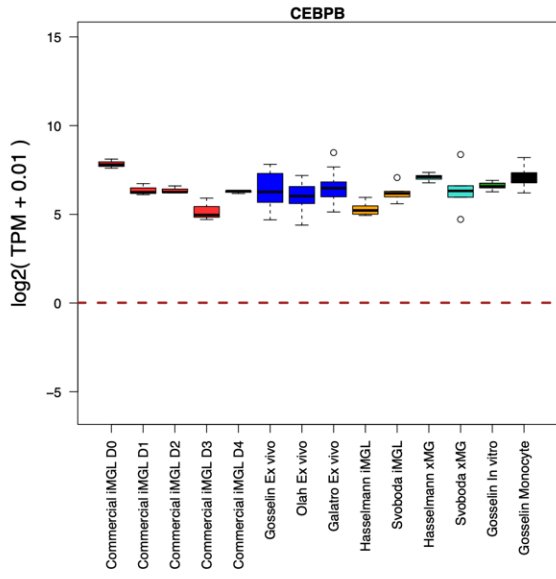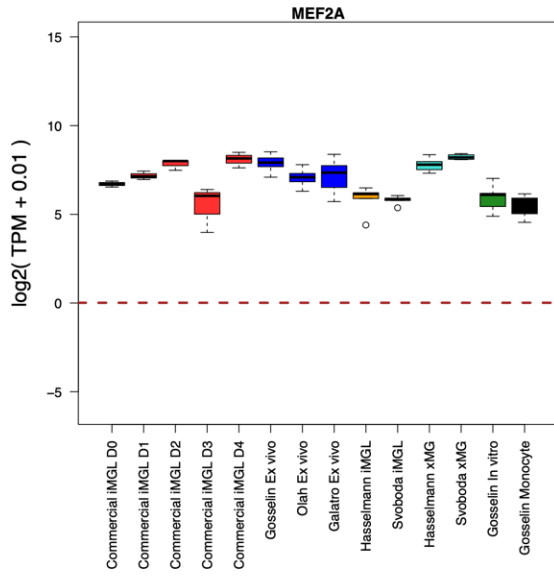

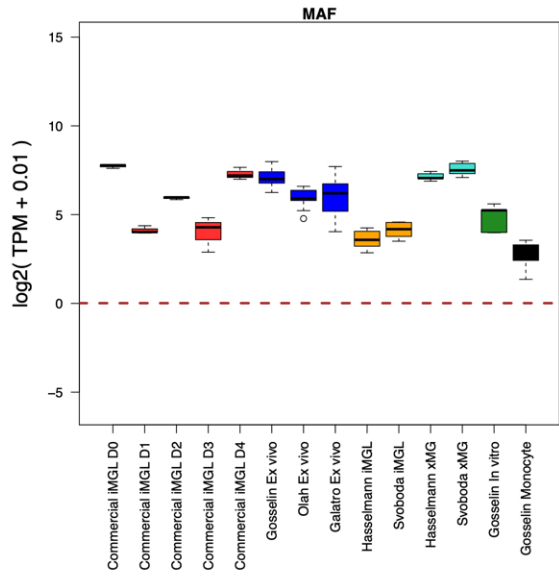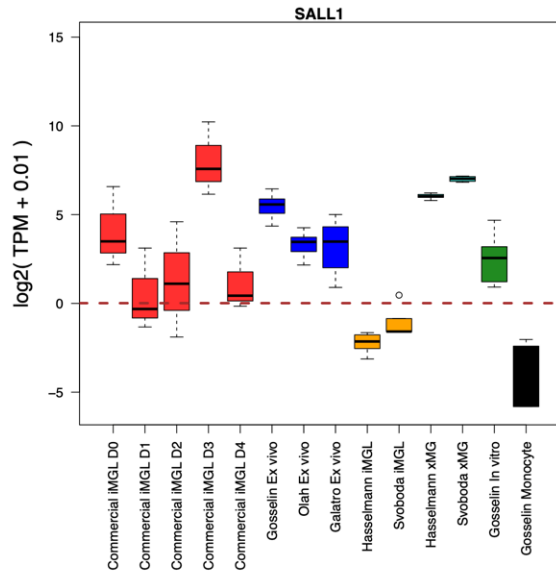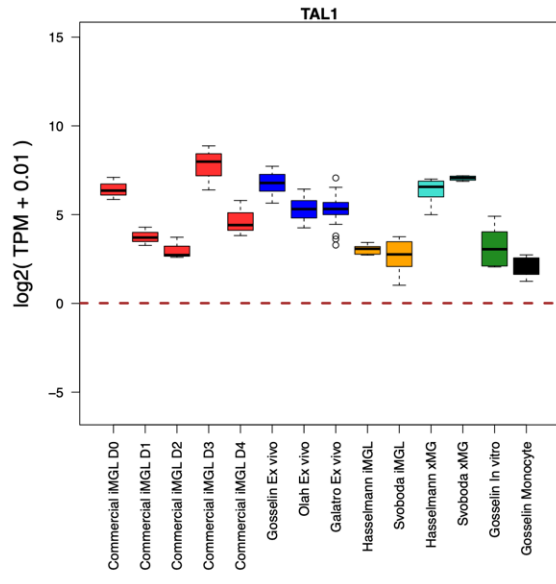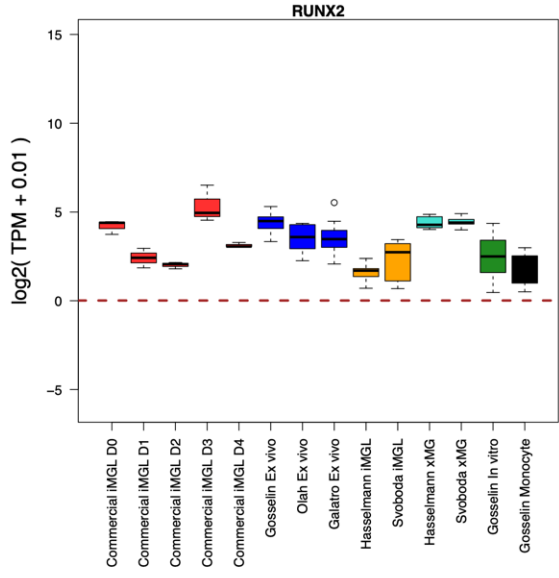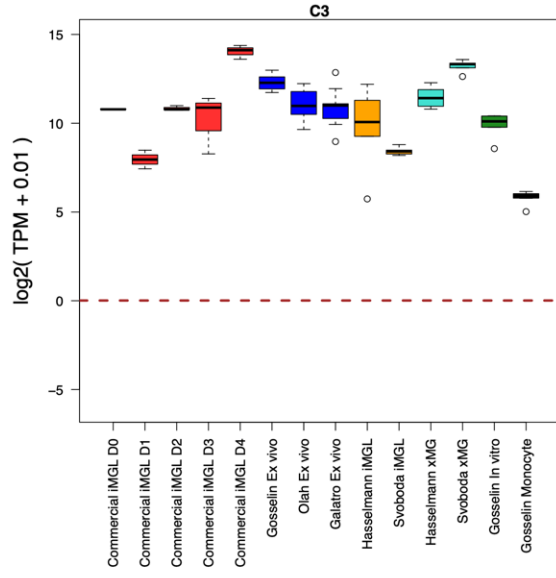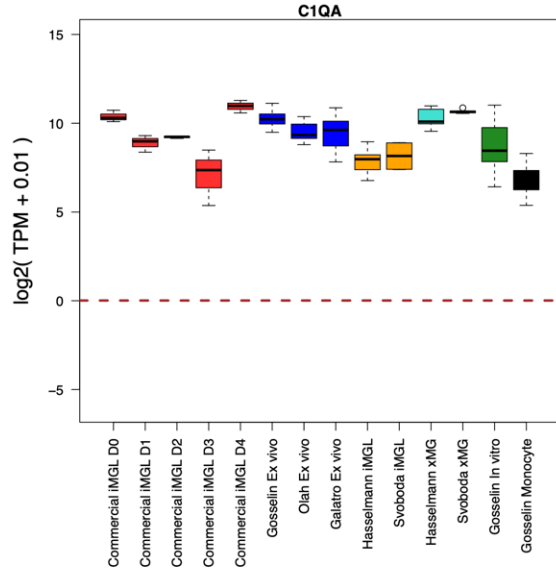

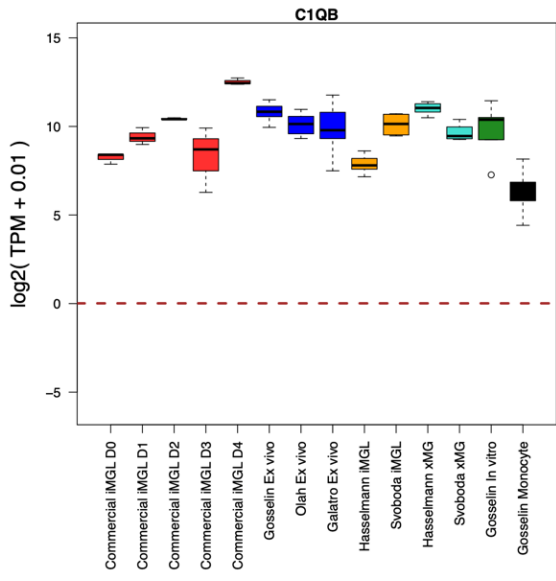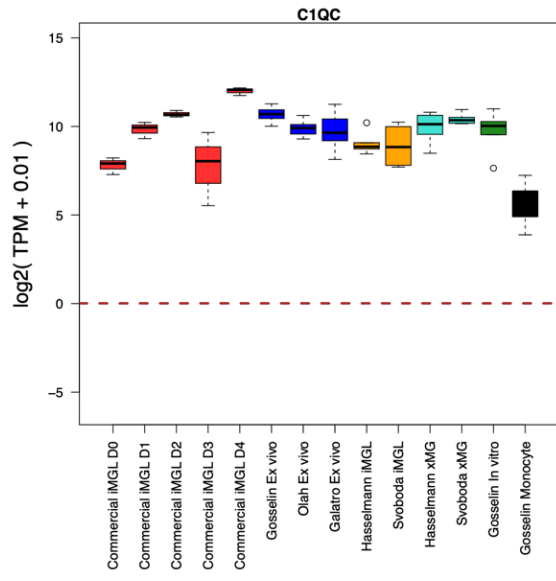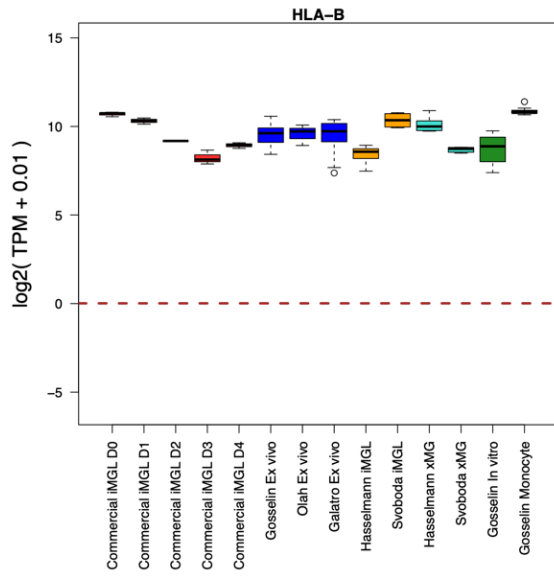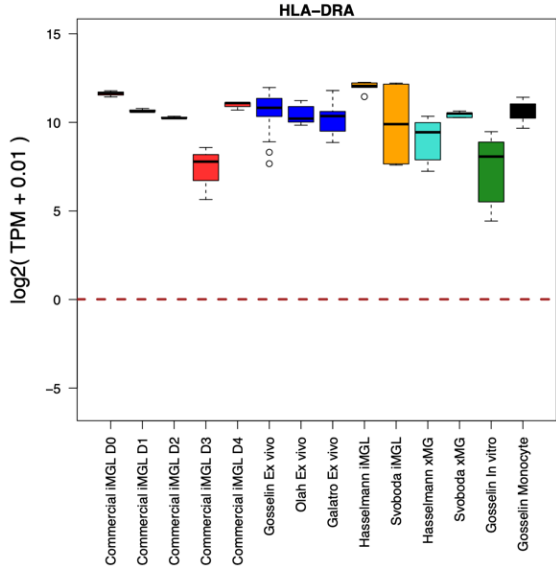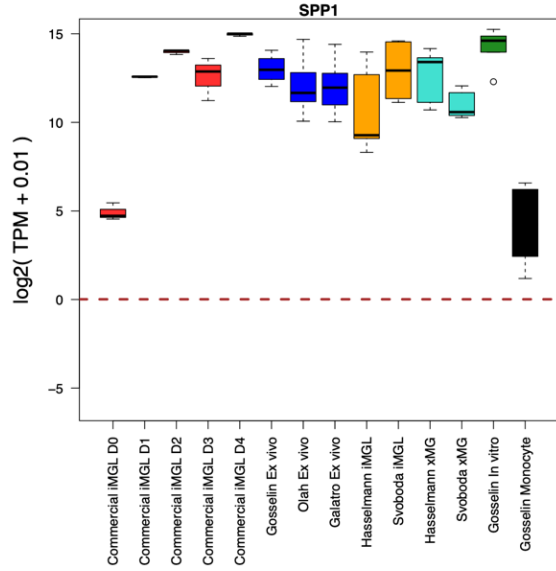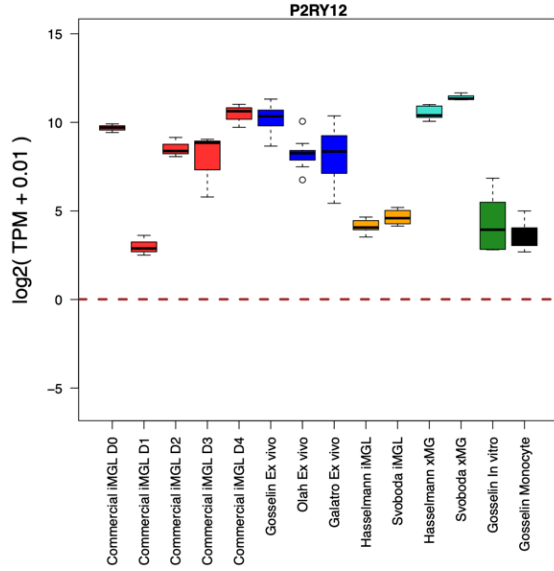

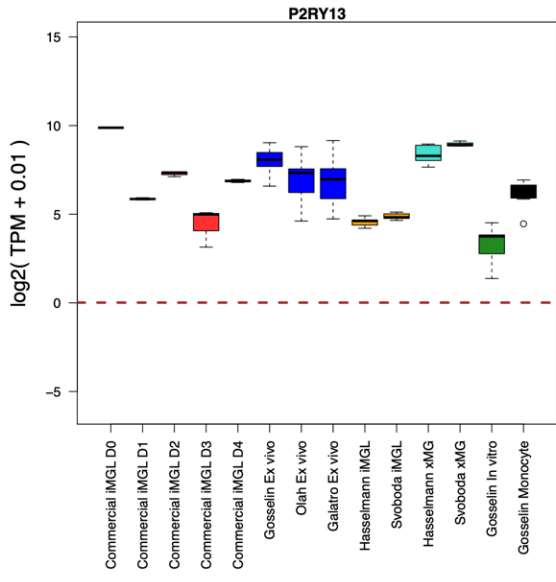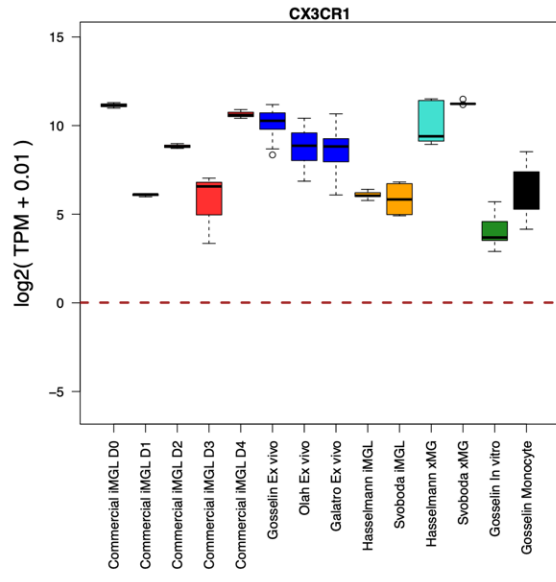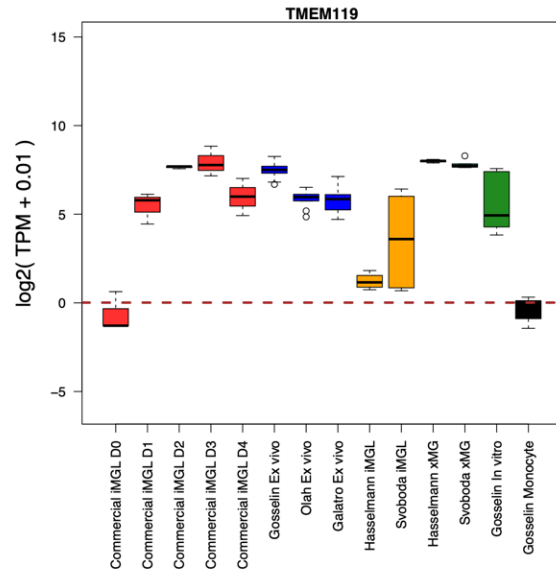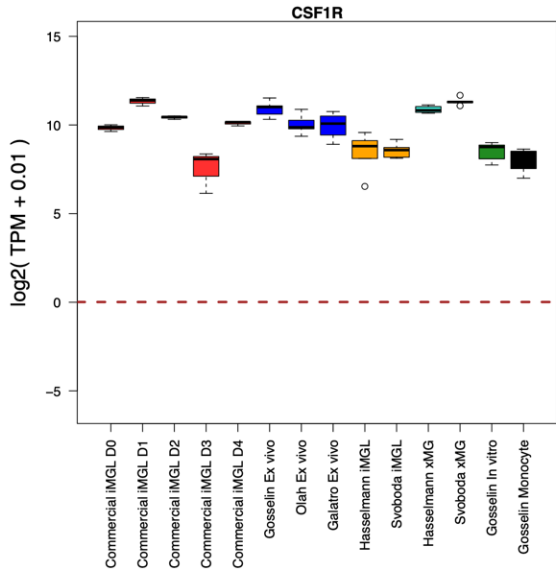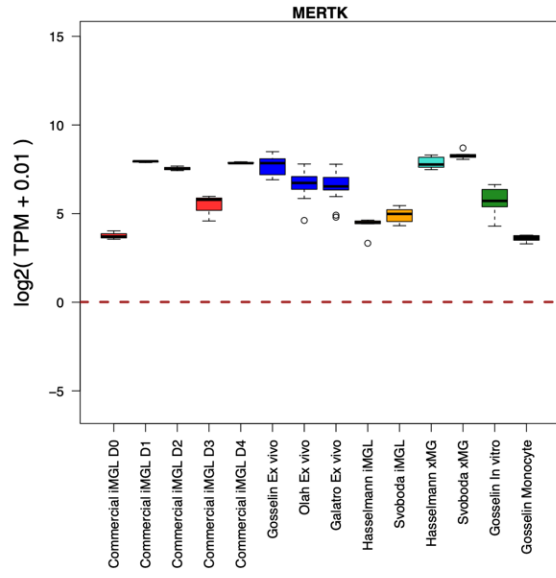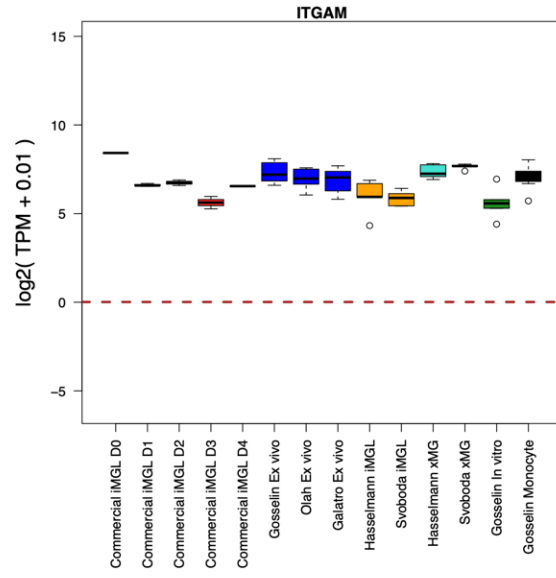

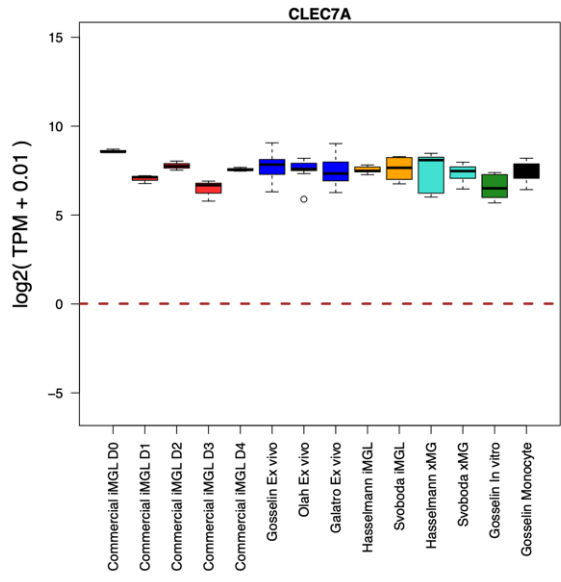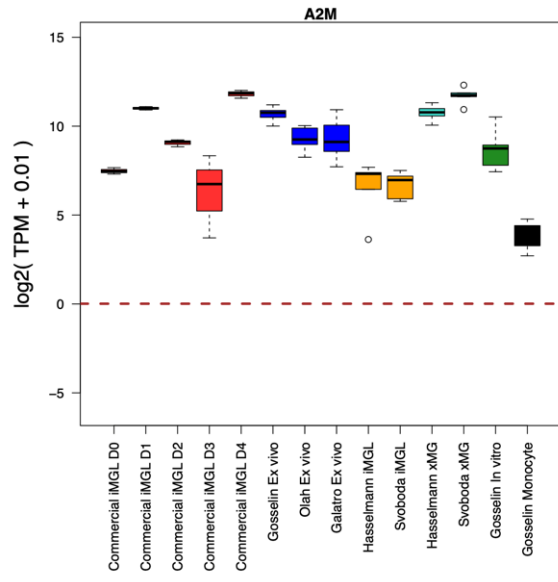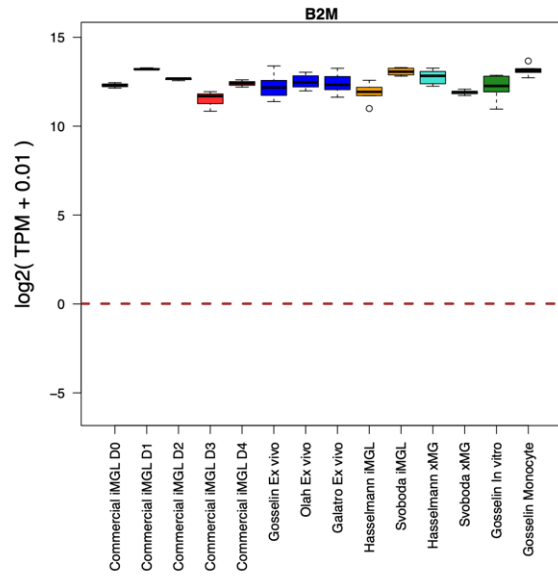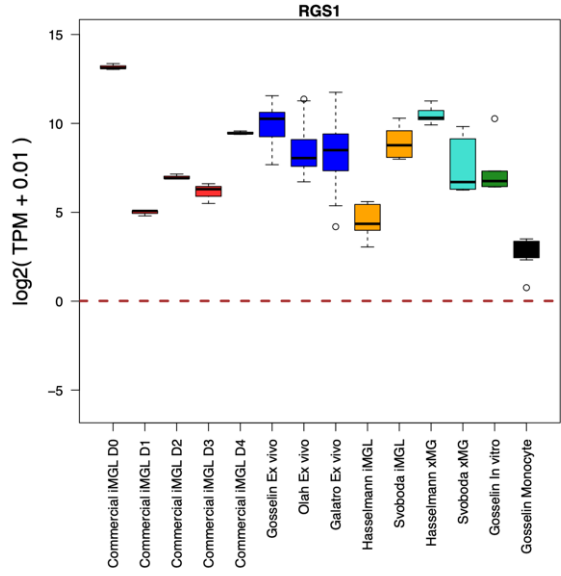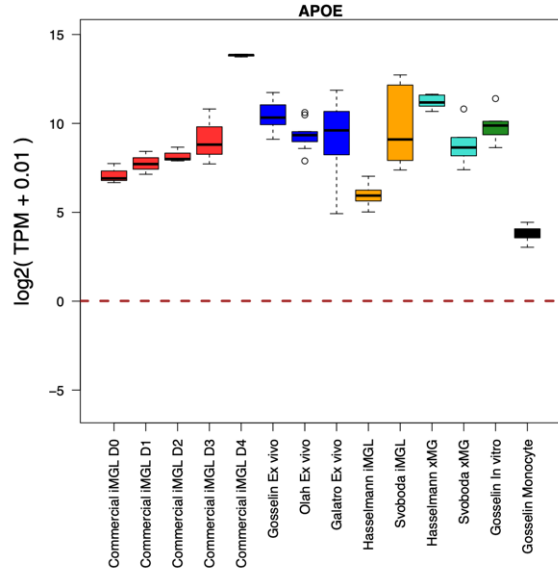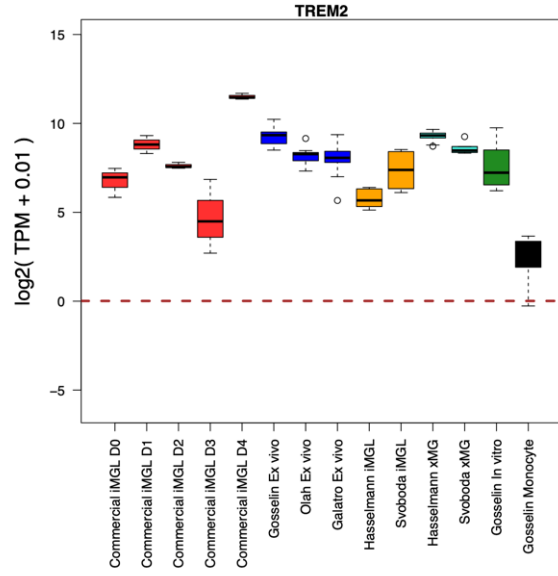

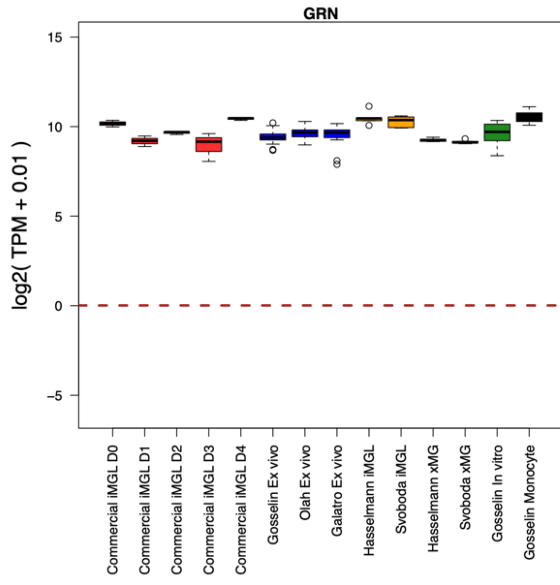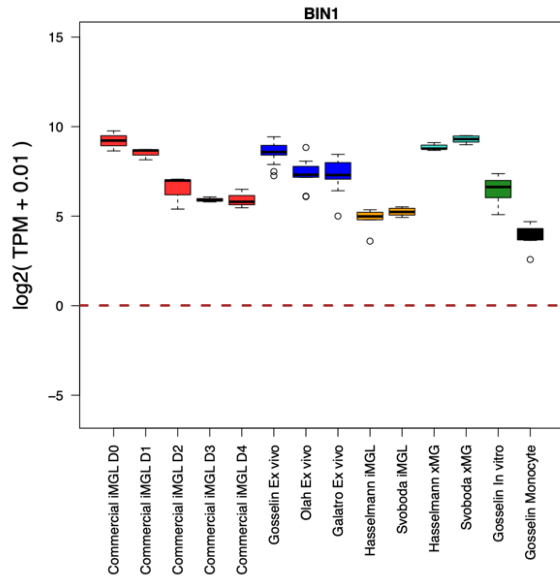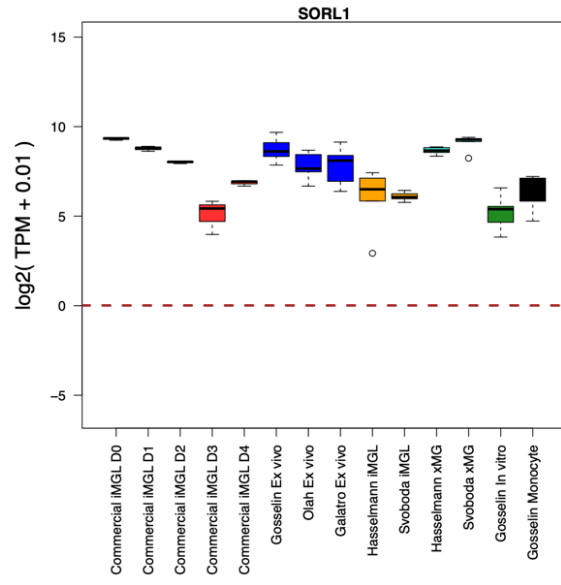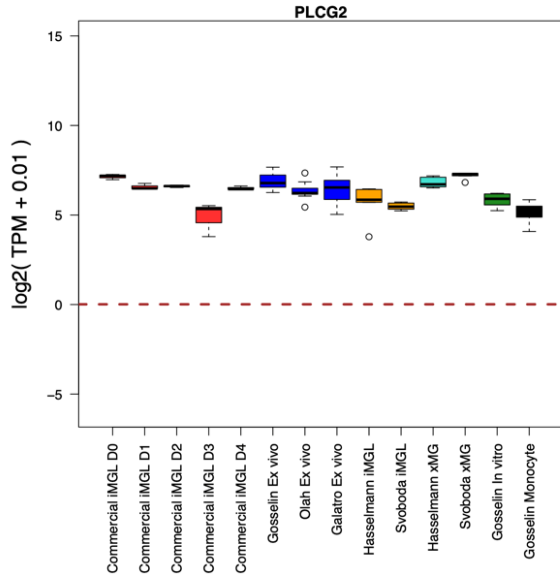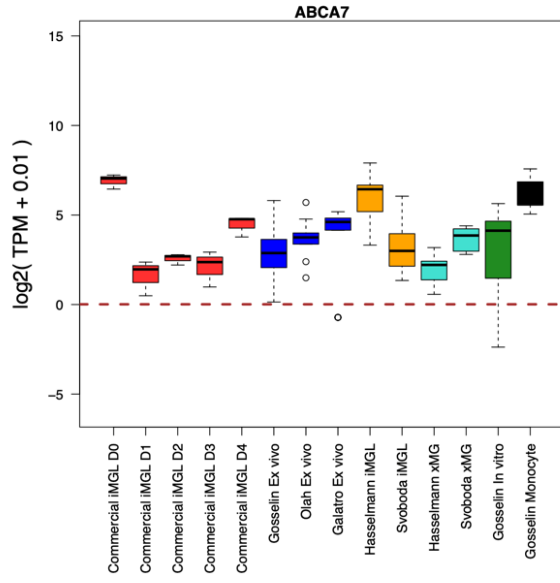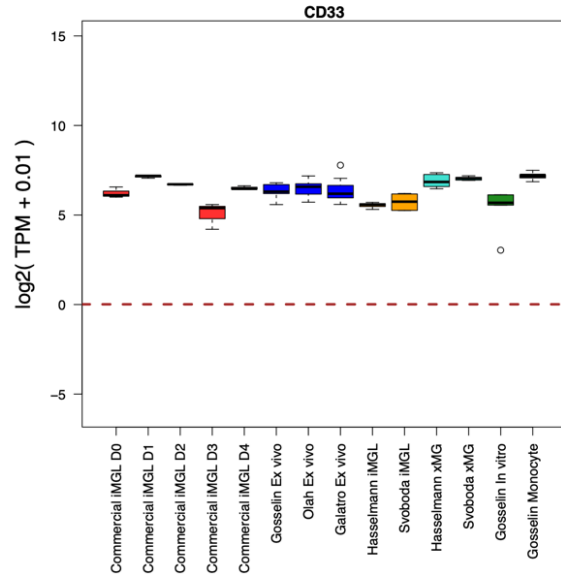



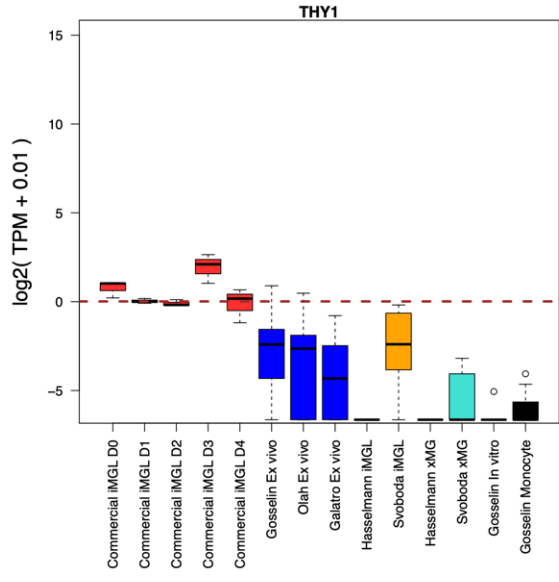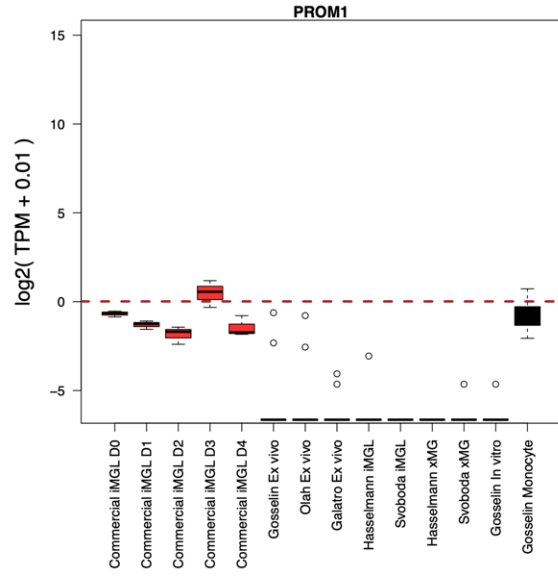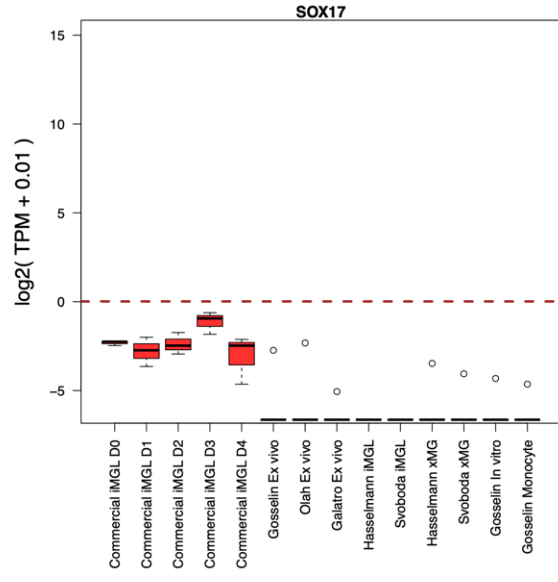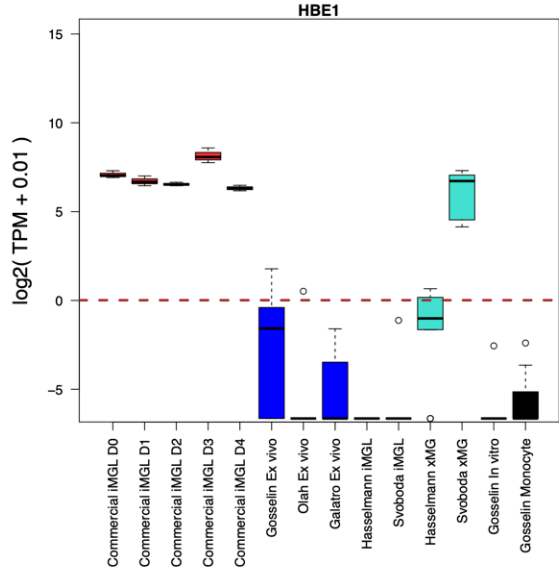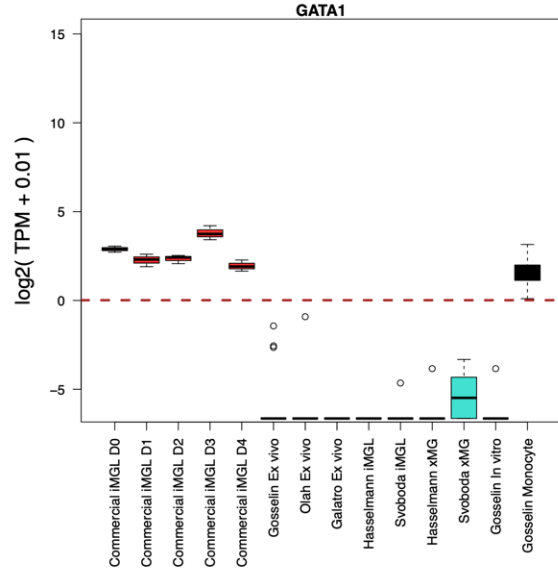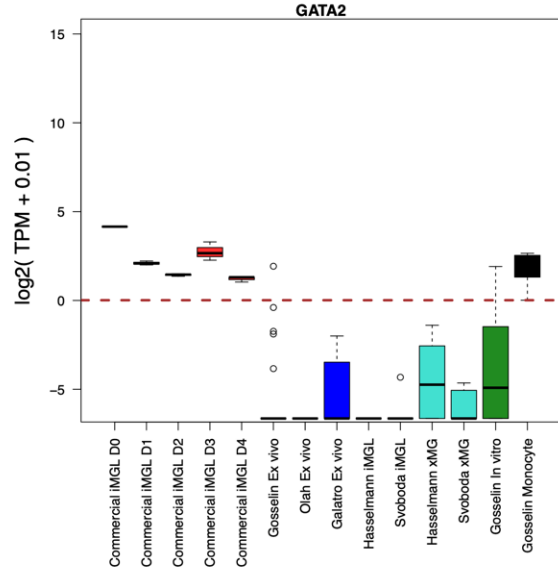

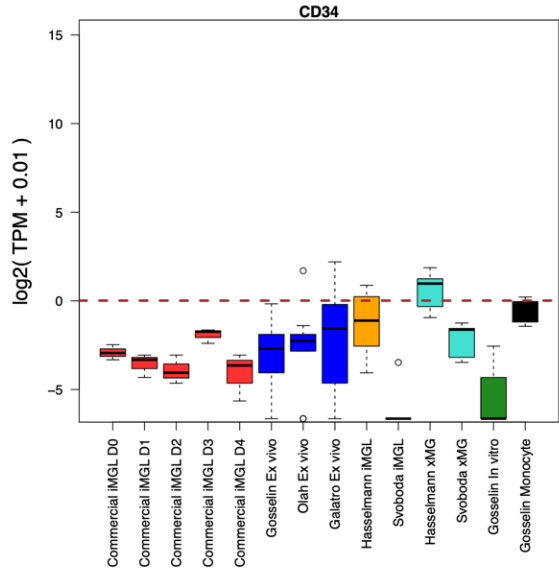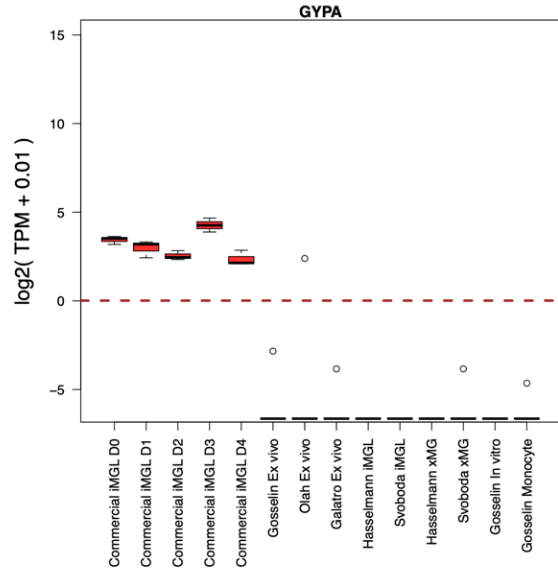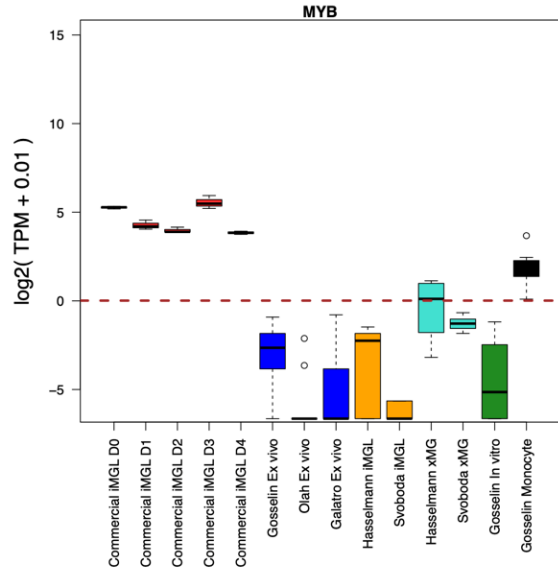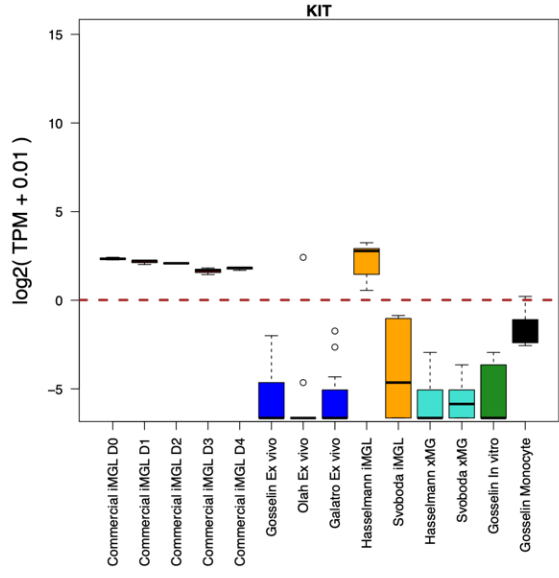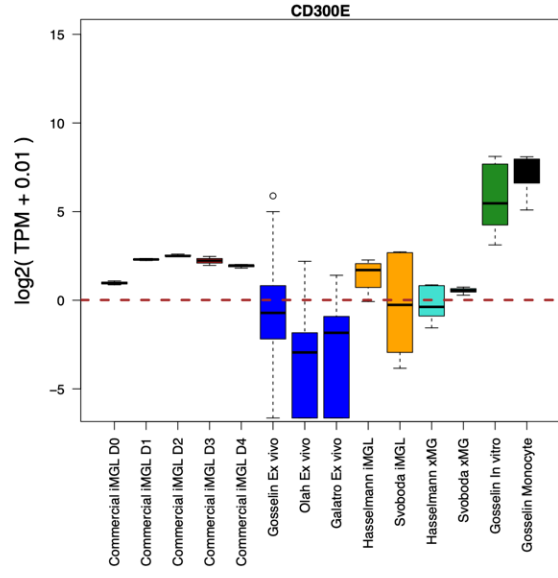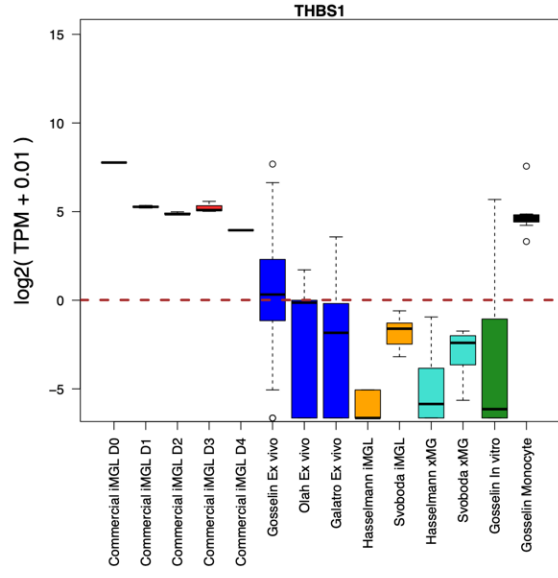

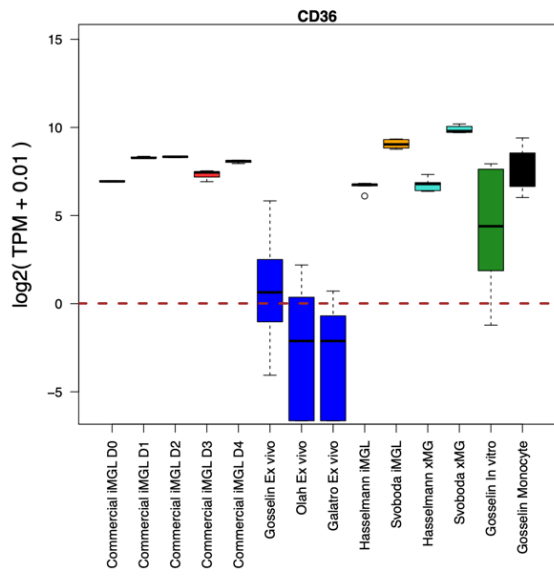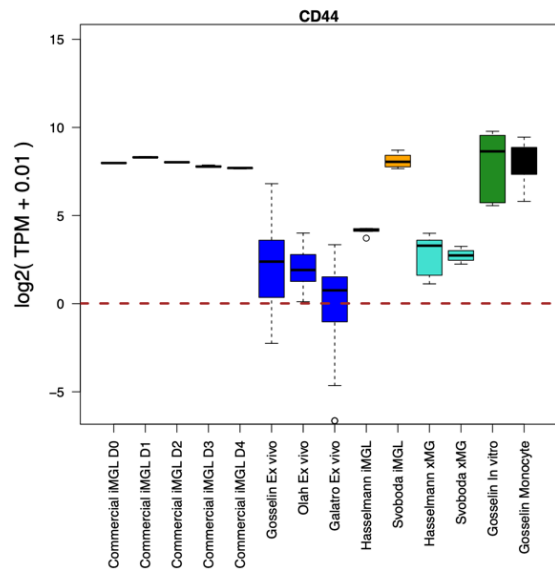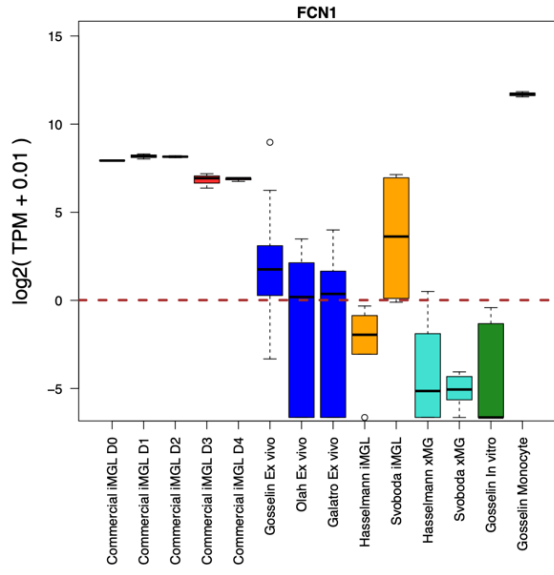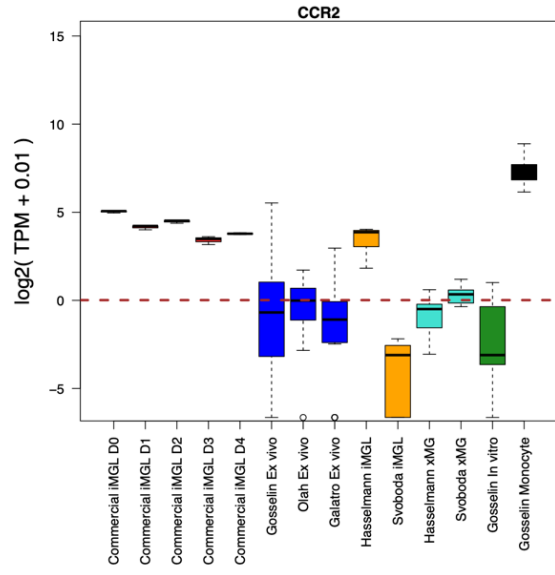

**Supplementary Figure 4.** Expression of key microglia related genes across the Commercial iMGL samples and microglia comparator datasets.

Microglia TFs: SPI1, IRF8, RUNX1, FOS, CEBPB, MEF2A, MAF, SALL1, TAL1, RUNX2

Microglia core marker genes: C3, C1QA, C1QB, C1QC, HLA-B, HLA-DRA, SPP1, P2RY12, P2RY13, CX3CR1, TMEM119, CSF1R, MERTK, ITGAM, CLEC7A, A2M, B2M, RGS1

Disease genes: APOE, TREM2, GRN, BIN1, SORL1, PLCG2, ABCA7, CD33

Myeloid progenitor and monocyte marker genes: THY1, PROM1, SOX17, HBE1, GATA1, GATA2, CD34, GYPA, MYB, KIT, CD300E, THBS1, CD36, CD44, FCN1, CCR2

**A**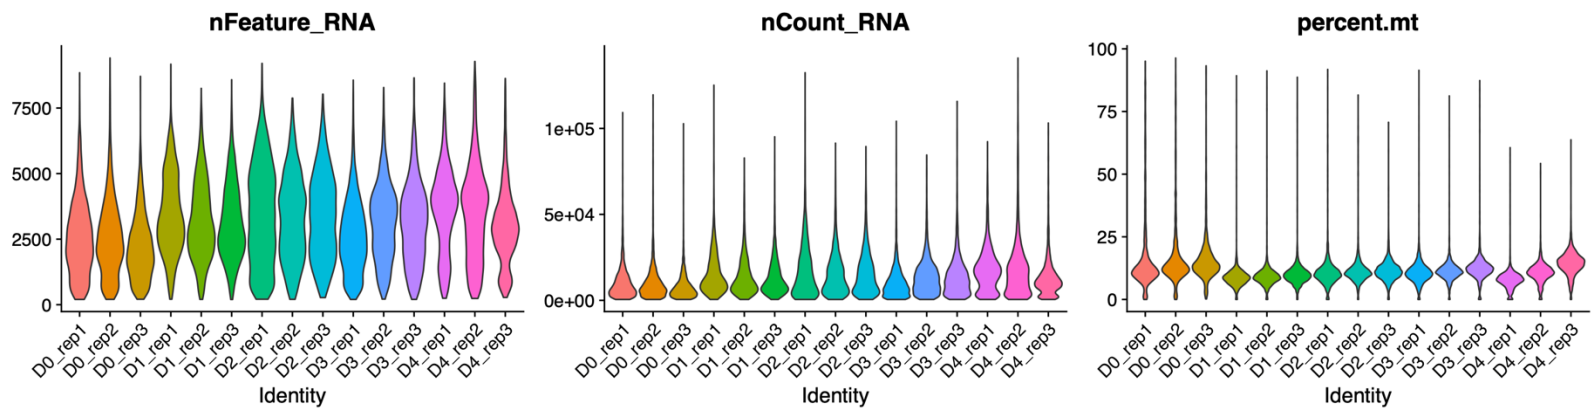**B**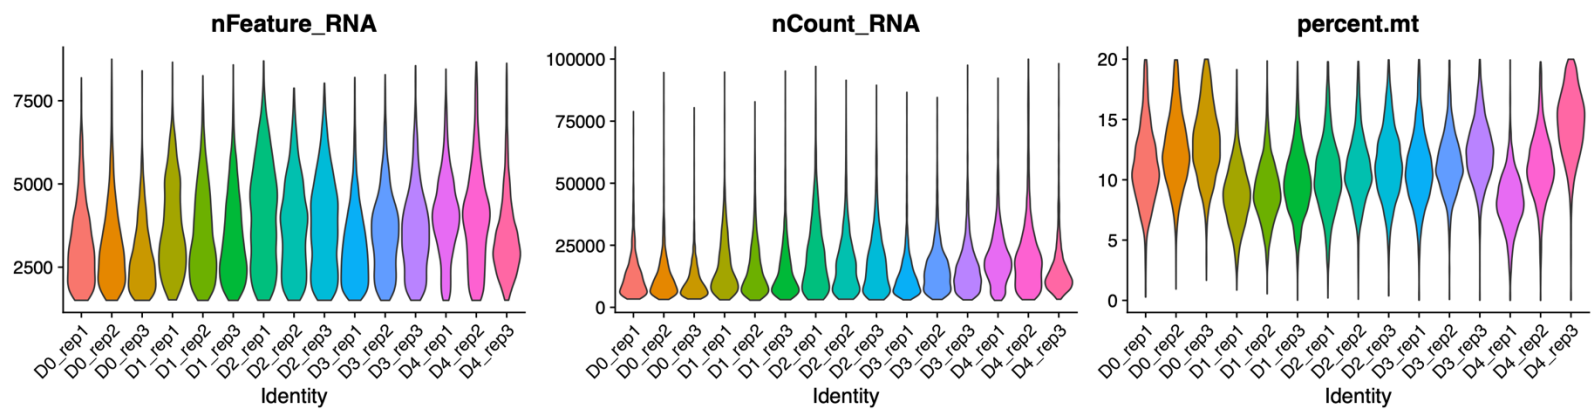

**Supplementary Figure 5.** Quality control (QC) metrics for Commercial iMGL time course single cell RNA-seq dataset. The number of genes (nFeature\_RNA), reads (nCount\_RNA), and percentage of mitochondrial reads (percent.mt) for cells in each sample **A**) before and **B**) after applying QC filters.

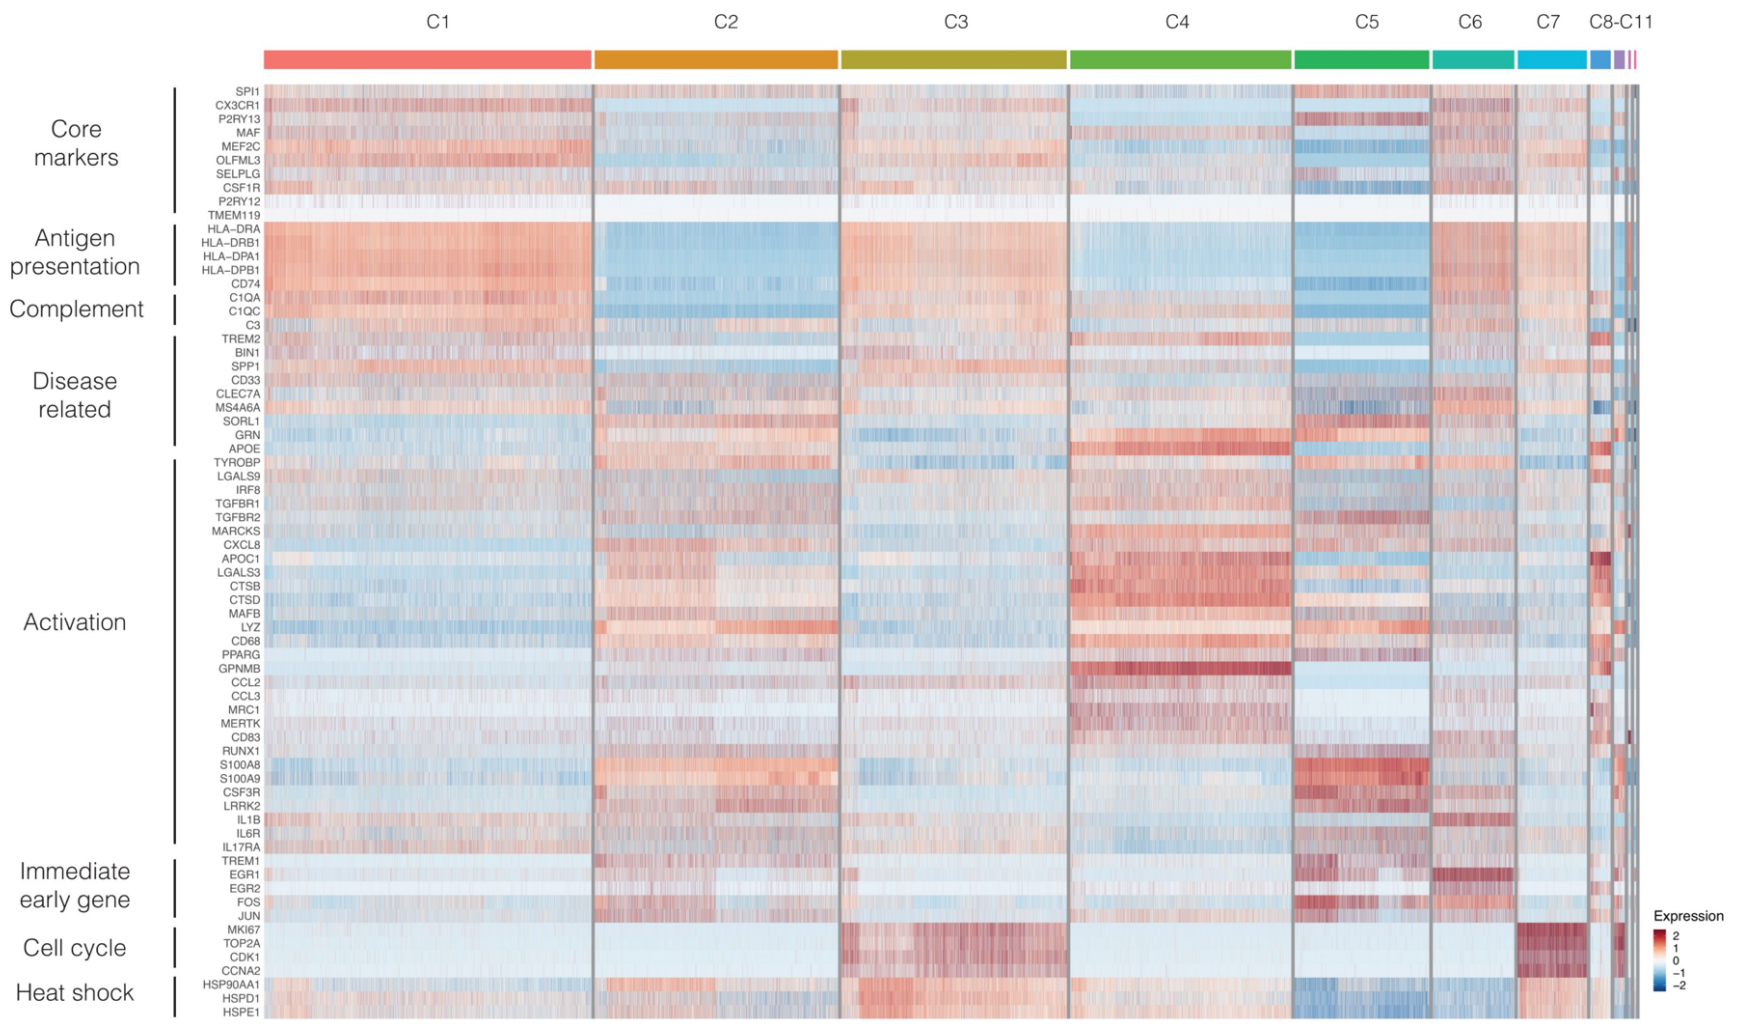

Core markers

Antigen presentation  
Complement

Disease related

Activation

Immediate early gene

Cell cycle

Heat shock

SPH1  
CX3CR1  
P2RY13  
MAF  
MEF2C  
OLFML3  
SELP1G  
CSF1R  
P2RY12  
TMEM119  
HLA-DRA  
HLA-DRB1  
HLA-DPA1  
HLA-DPB1  
CD74  
C1QA  
C1QC  
C3  
TREM2  
BIN1  
SPP1  
CD33  
CLEC7A  
MS4A6A  
SORL1  
GRN  
APOE  
TYROBP  
LGALS9  
IRF8  
TGFBRI1  
TGFBRI2  
MARCKS  
CXCL8  
APOC1  
LGALS3  
CTSB  
CTSD  
MAFB  
LYZ  
CD68  
PPARG  
GPNMB  
CCL2  
CCL3  
MRC1  
MERTK  
CD83  
RUNX1  
S100A8  
S100A9  
CSF3R  
LRRK2  
IL1B  
IL5R  
IL17RA  
TREM1  
EGR1  
EGR2  
FOS  
JUN  
MKI67  
TOP2A  
CDK1  
CCNA2  
HSP90AA1  
HSPD1  
HSPET1

C1

C2

C3

C4

C5

C6

C7

C8-C11

Expression  
2  
1  
0  
-1  
-2

**Supplementary Figure 6.** Gene expression heatmap of microglia functional marker genes in the time course single cell RNA-seq dataset.





**Supplementary Figure 7.** Identification of preferentially expressed marker genes and their top gene ontology enrichments for each cellular cluster in the time course single cell RNA-seq dataset.

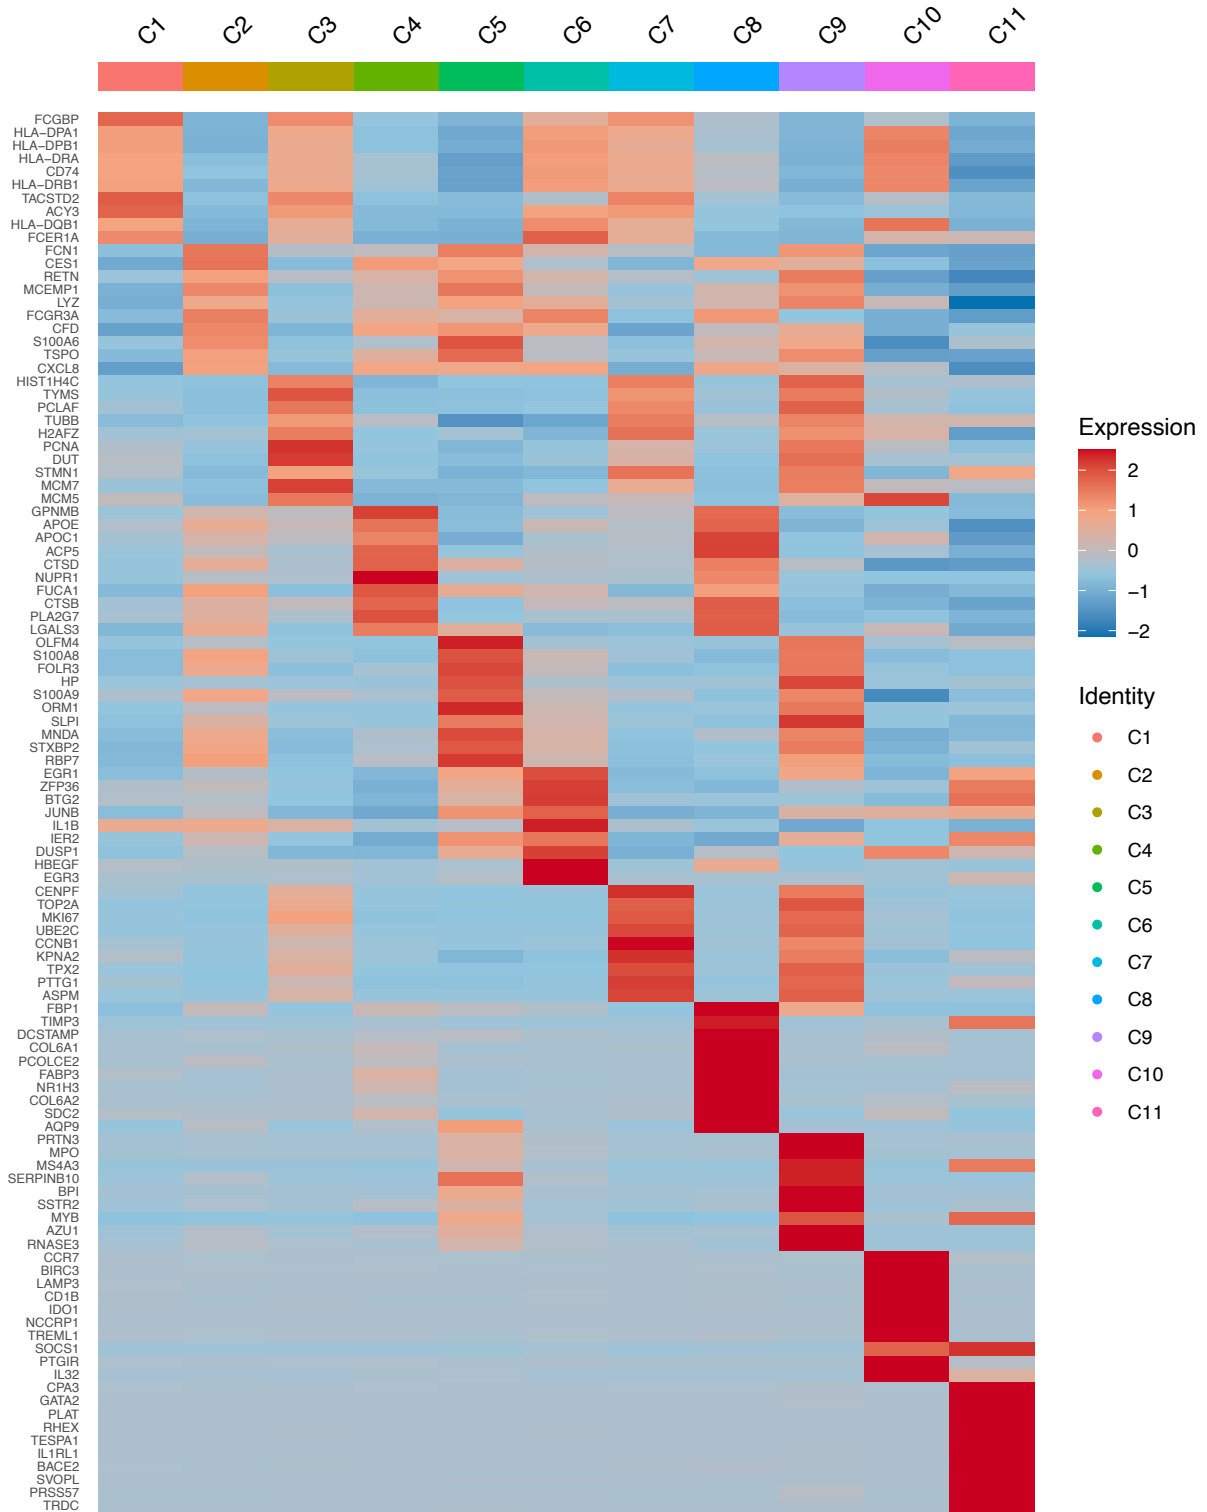

**Supplementary Figure 8.** Heatmap of average gene expression per cluster of the top 10 marker genes for each cluster in the time course single cell RNA-seq dataset.

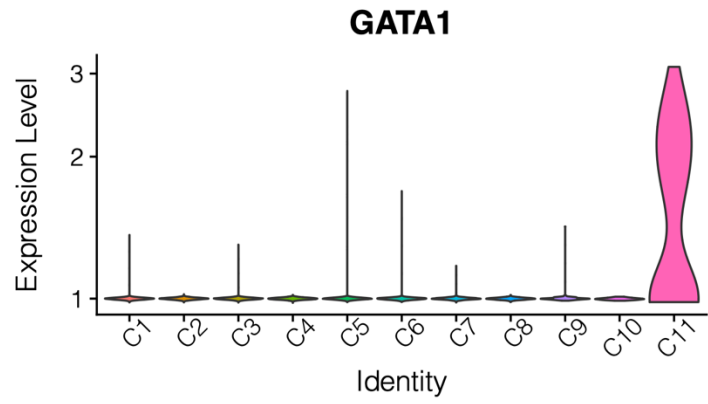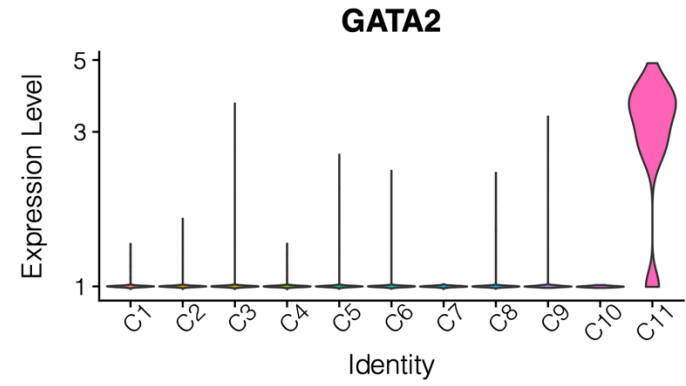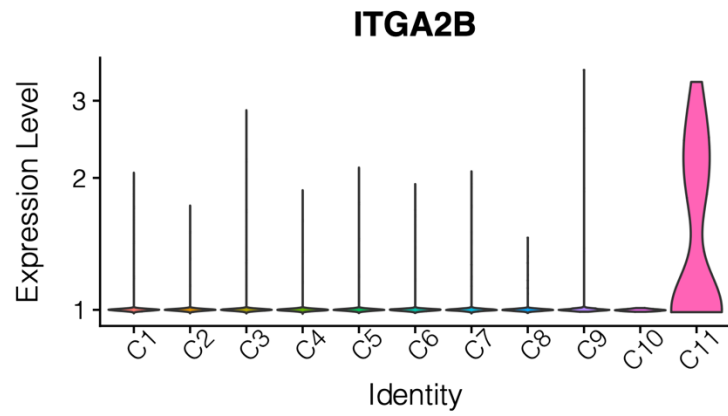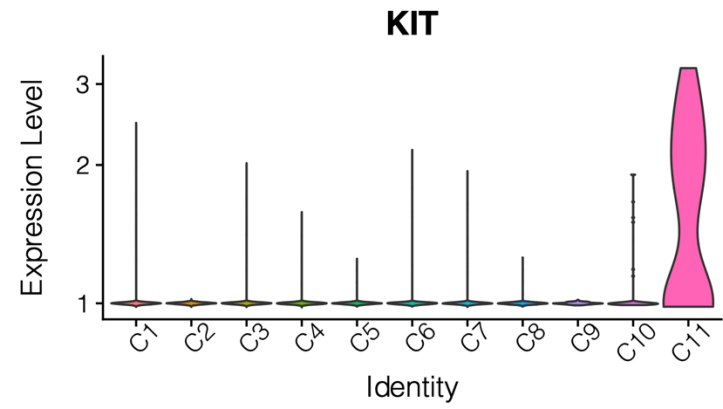

**Supplementary Figure 9.** Expression of progenitor (GATA1, GATA2, KIT) and monocyte (ITGA2B) marker genes across the 11 single cell clusters.

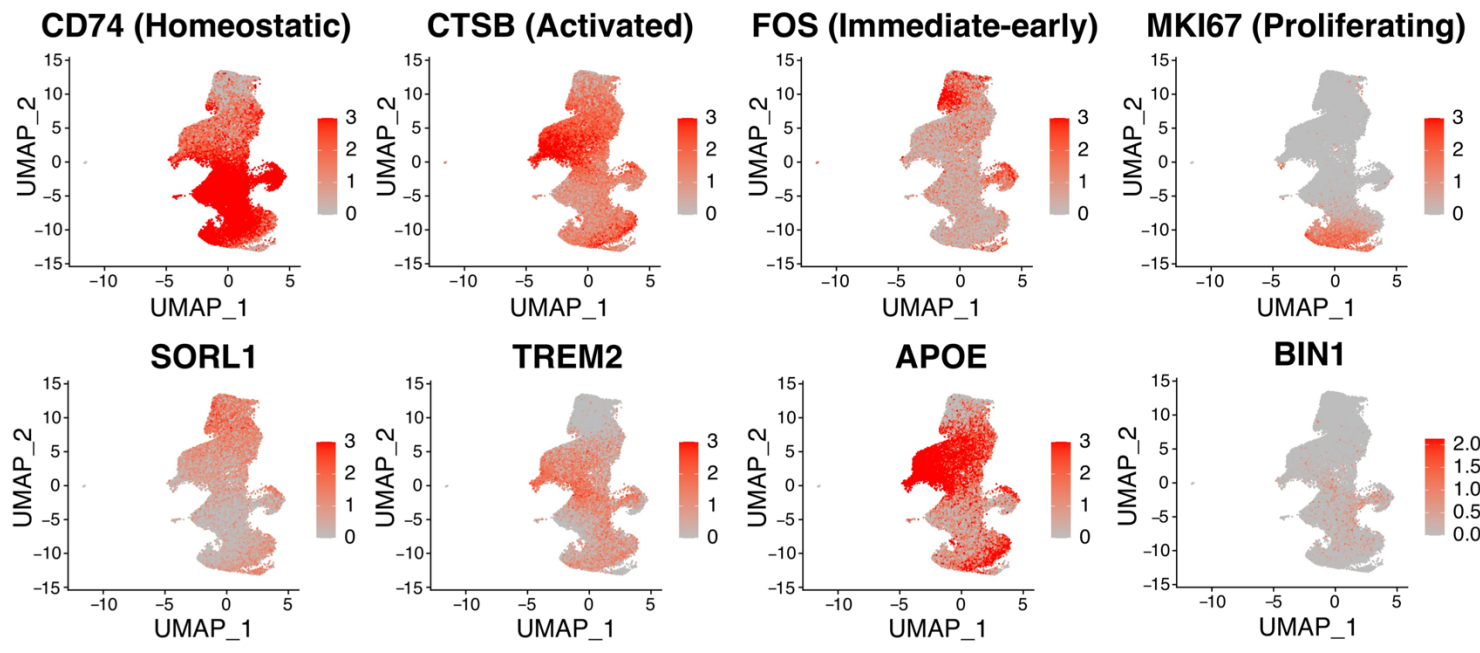

**Supplementary Figure 10.** Relative expression of key homeostatic (CD74), activated (CTSB), immediate-early (FOS), proliferating (MKI67), and AD-associated (SORL1, TREM2, APOE, BIN1) genes across the individual cells. Expression values were scaled using the FeaturePlot method in Seurat.



| <u>Ex vivo subcluster</u> | <u>Functional annotation</u>      |
|---------------------------|-----------------------------------|
| Olah 1                    | Homeostatic                       |
| Olah 2                    | Homeostatic                       |
| Olah 3                    | Activated, distressed             |
| Olah 4                    | Activated, interferon response    |
| Olah 5                    | Activated, anti-inflammatory      |
| Olah 6                    | Activated, anti-inflammatory      |
| Olah 7                    | Homeostatic, antigen presentation |
| Olah 8                    | Metabolic                         |
| Olah 9                    | Proliferative                     |
| Olah 10                   | Monocytes                         |
| Olah 11                   | T cells                           |
| Olah 12                   | B cells                           |
| Olah 13                   | GFAP+ cells                       |
| Olah 14                   | Red blood cells                   |
| Sankowski 1               | Activated                         |
| Sankowski 2               | Homeostatic, antigen presentation |
| Sankowski 3               | Homeostatic                       |
| Sankowski 5               | Activated                         |
| Sankowski 6               | Metabolic                         |
| Sankowski 7               | Metabolic                         |
| Sankowski 8               | Activated                         |
| Sankowski 9               | Activated                         |

**Supplementary Figure 11.** Functional annotations of ex vivo cell clusters curated from their descriptions in the Olah and Sankowski publications.

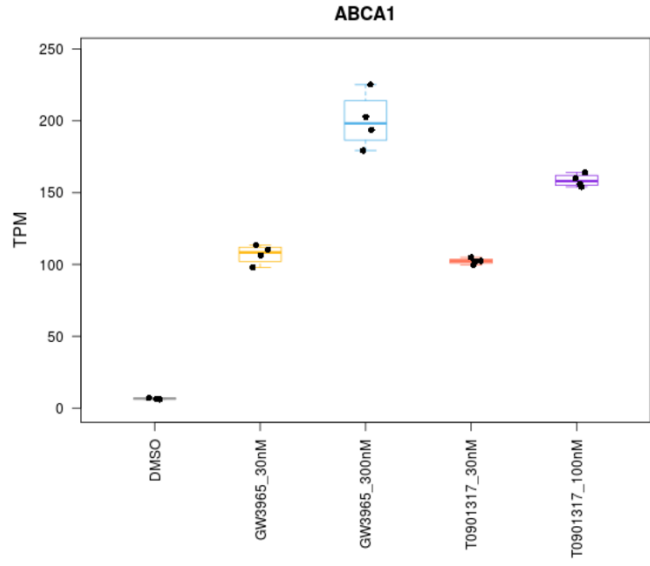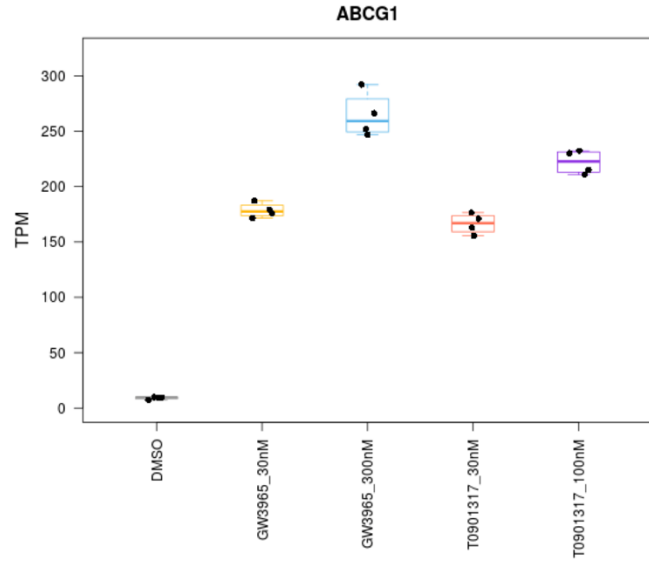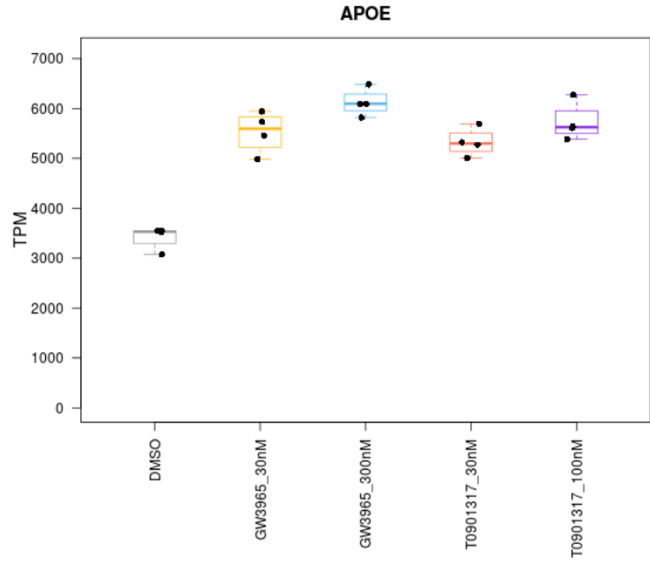

**Supplementary Figure 12.** Expression of known LXR pathway response genes (ABCA1, ABCG1, APOE) in the LXR pathway agonist treatment bulk RNA-seq dataset.

GW3965 30nM:

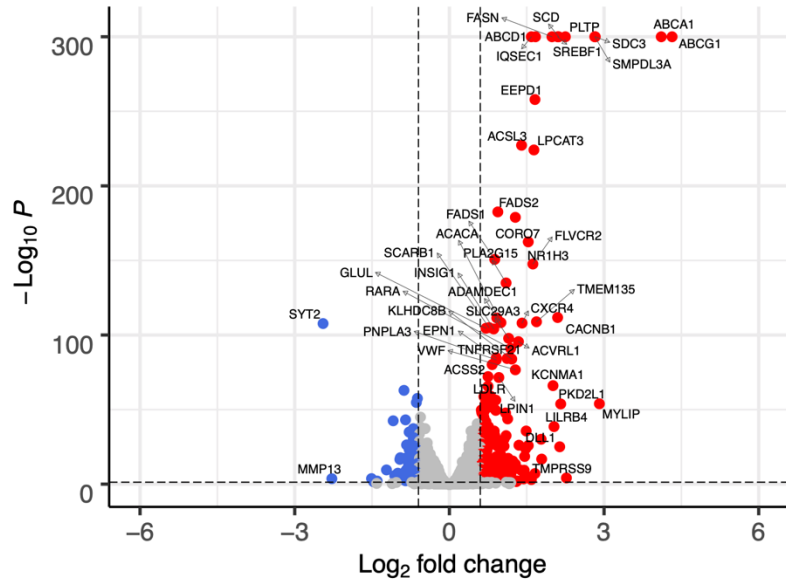

T0901317 30nM:

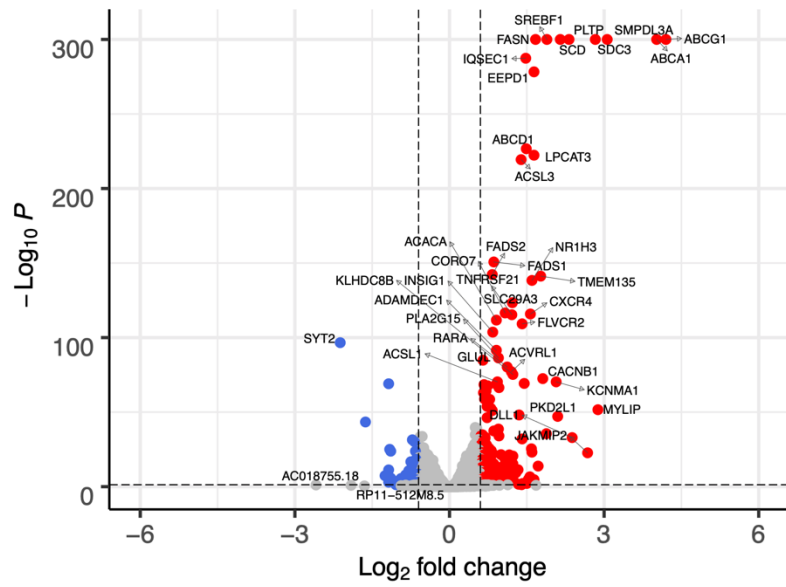

**Supplementary Figure 13.** Volcano plots showing relationship between expression fold change and significance for differential gene expression between GW3965 30nM and T0901317 30nM with DMSO treated cells. Genes with significant upregulation and downregulation are colored red and blue, respectively.

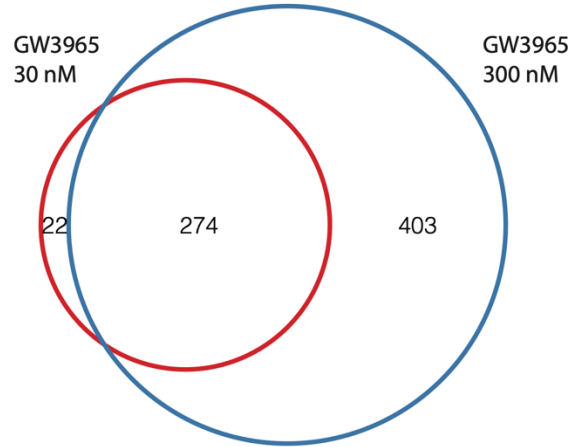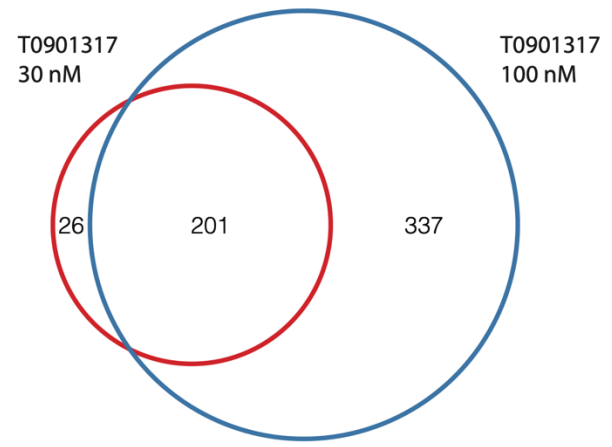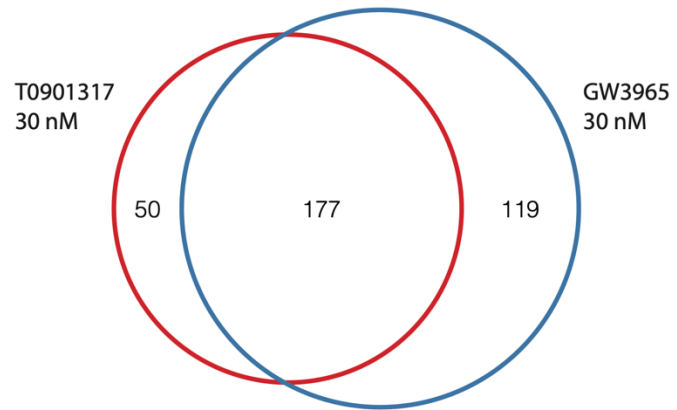

**Supplementary Figure 14.** Overlap in DEGs between GW3965 30nM and 300nM treatments.

Overlap in DEGs between T0901317 30nM and 100nM treatments. Overlap in DEGs between

GW3965 30nM and T0901317 30nM treatments.



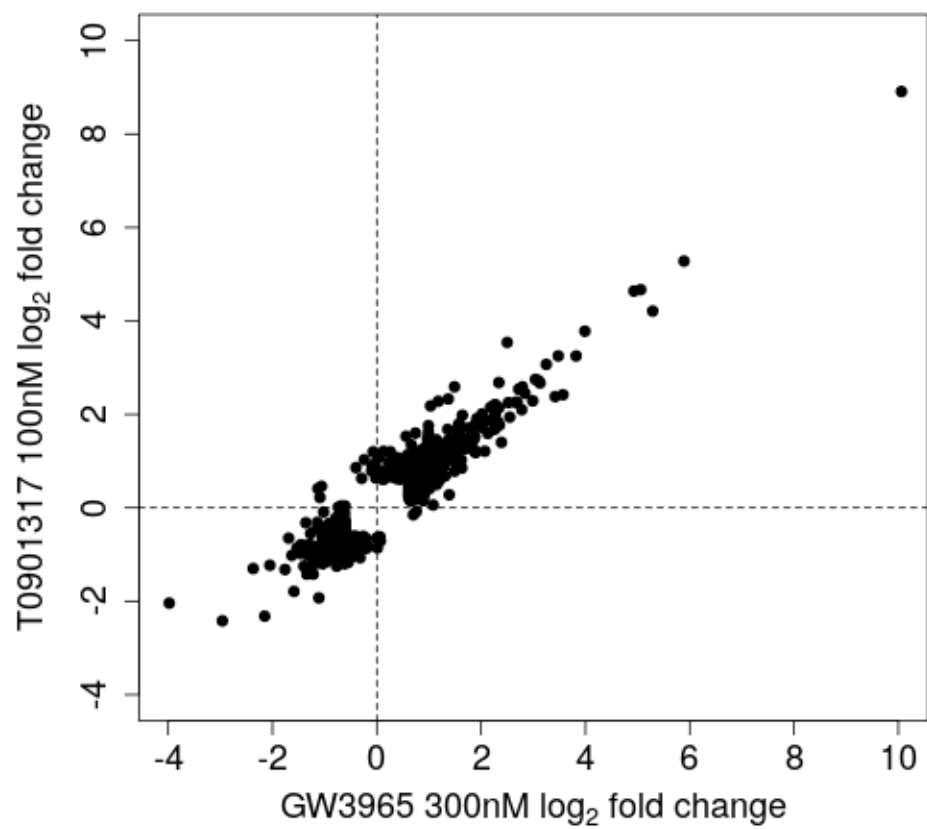

**Supplementary Figure 15.** Comparison of DEG fold changes between GW3965 300nM and T0901317 100nM treatments. The union of DEGs between the two treatments were used in this comparison.

**A**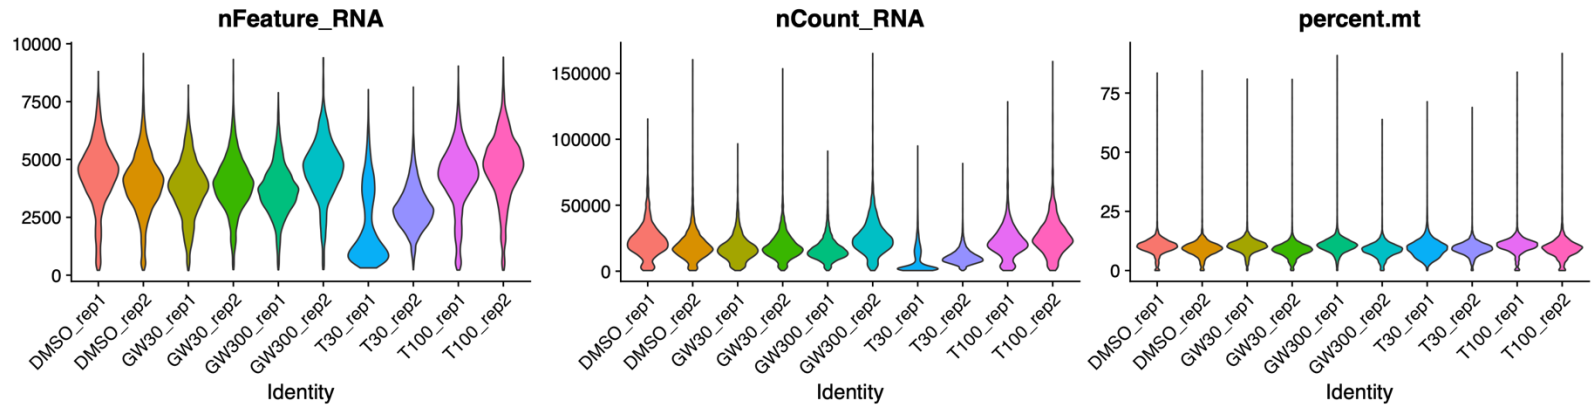**B**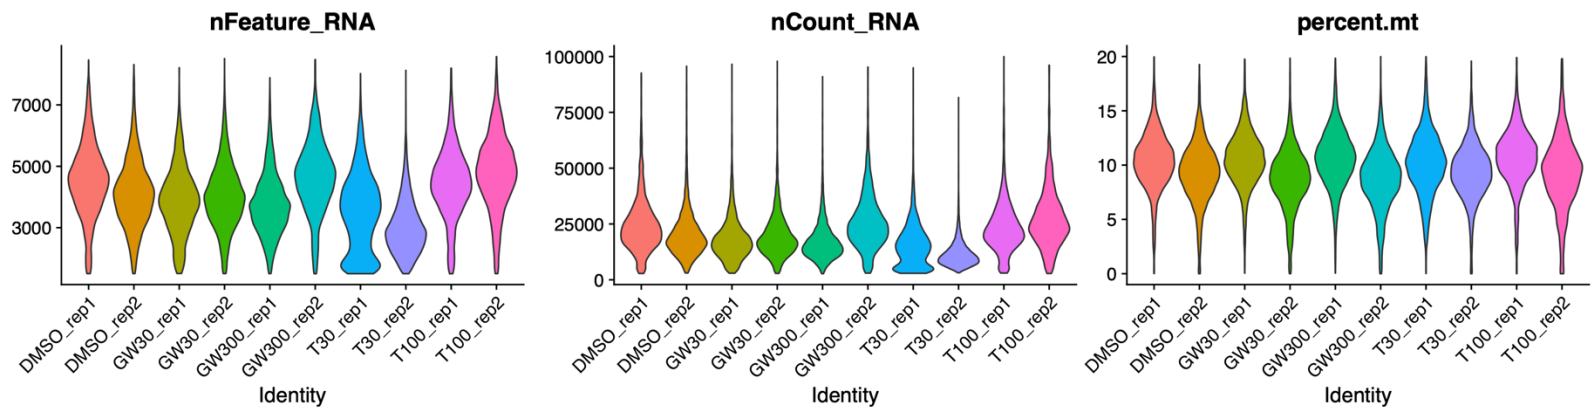

**Supplementary Figure 16.** QC metrics for LXR pathway agonist treatment single cell RNA-seq dataset. The number of genes (nFeature\_RNA), reads (nCount\_RNA), and percentage of mitochondrial reads (percent.mt) for cells for cells in each sample **A**) before and **B**) after applying QC filters.

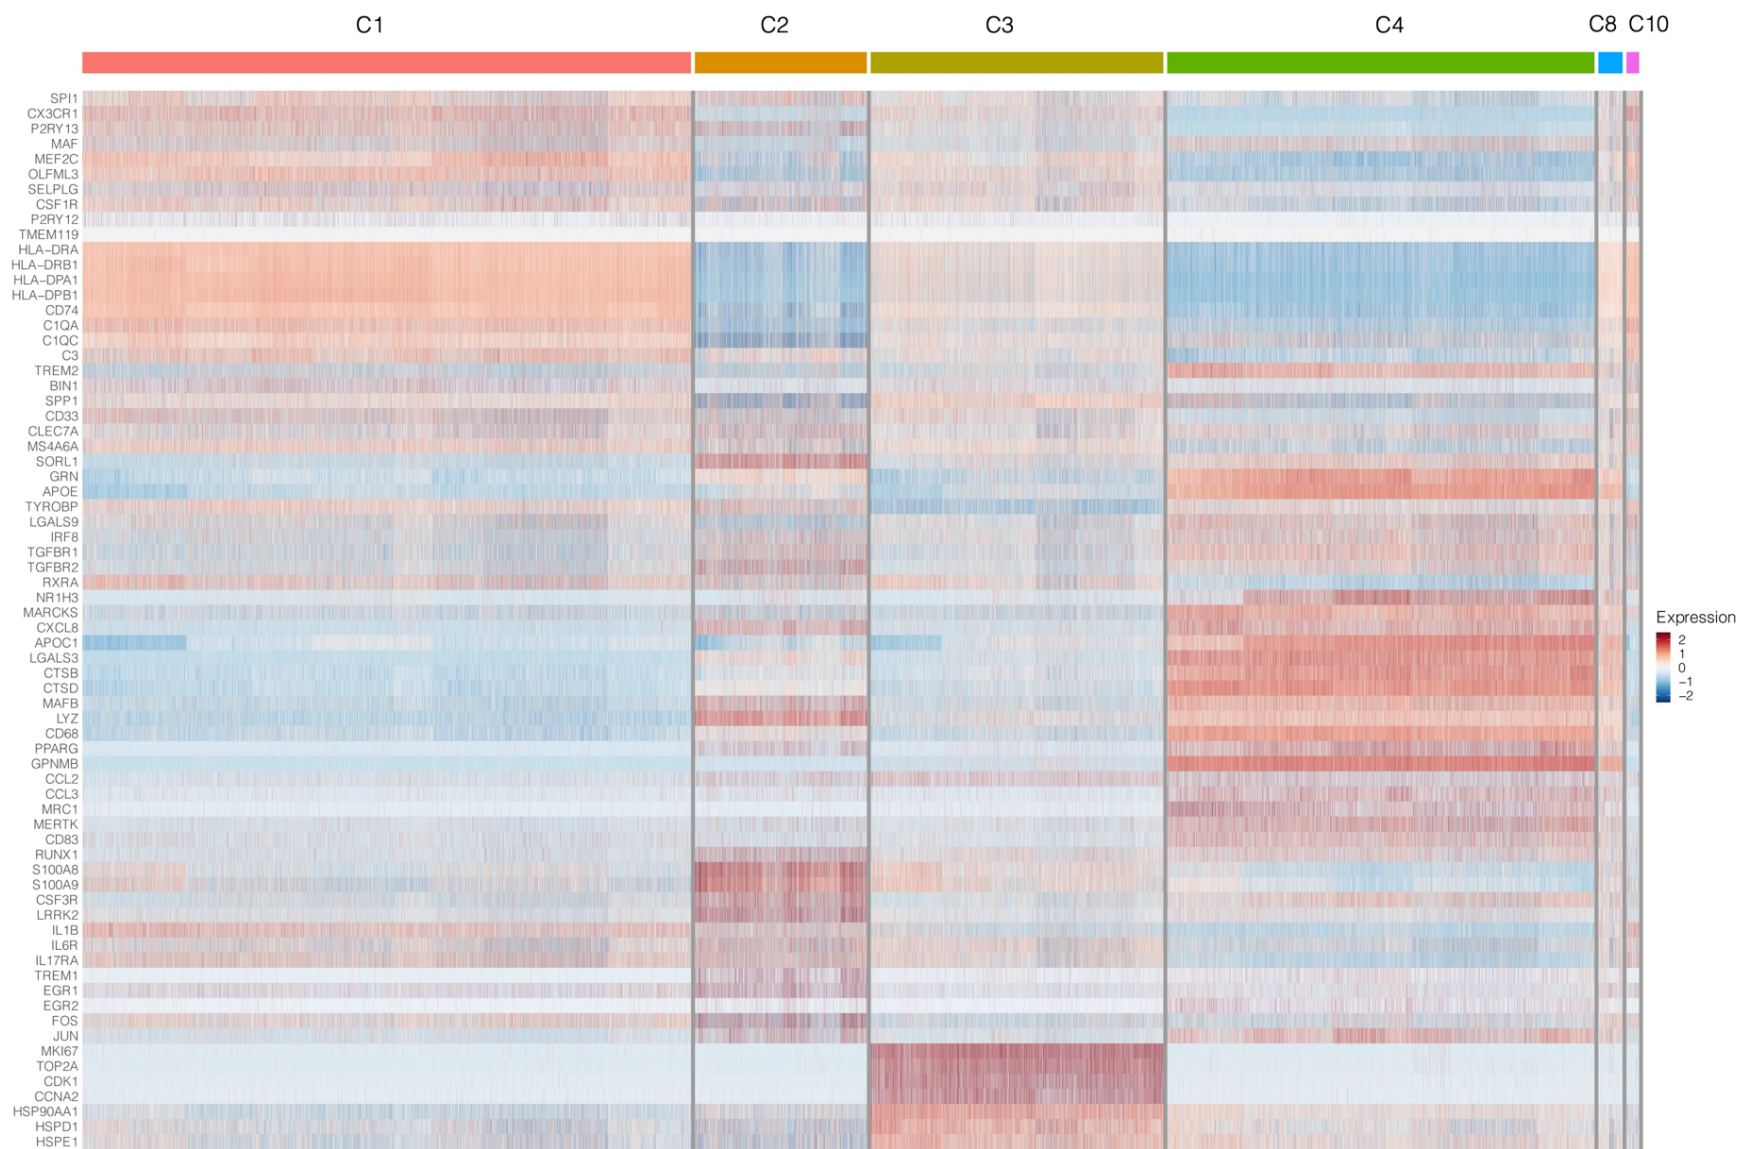

**Supplementary Figure 17.** Gene expression heatmap of microglia functional marker genes in the LXR pathway agonist treatment single cell RNA-seq dataset.

Upregulated

Downregulated

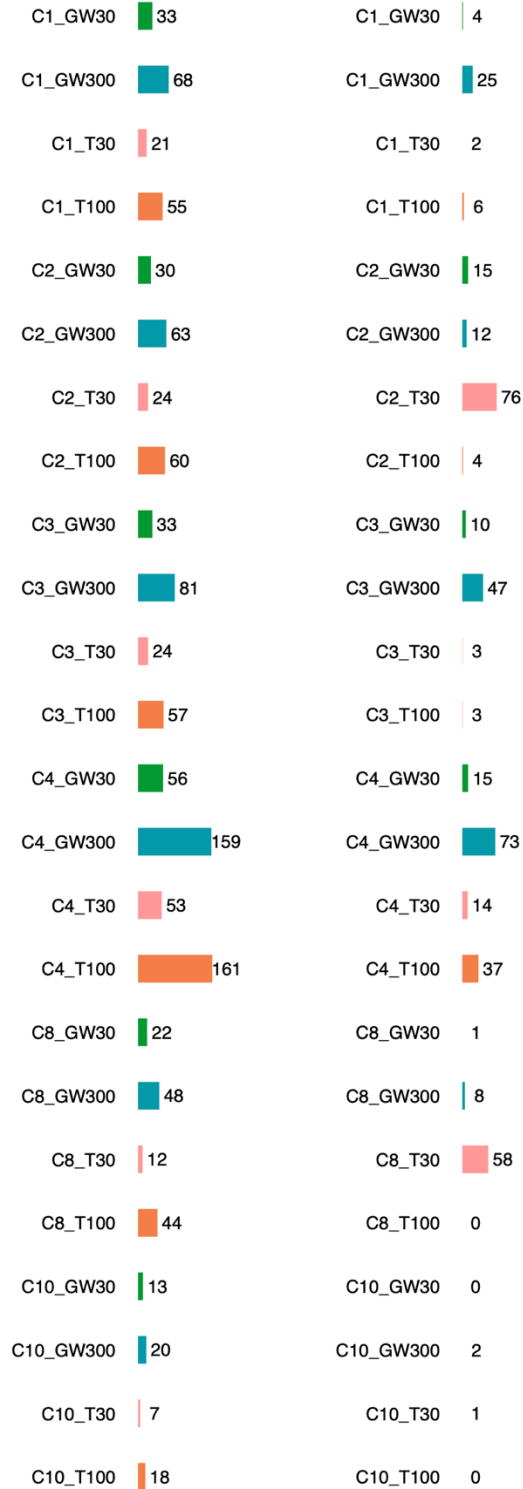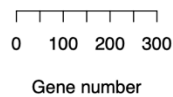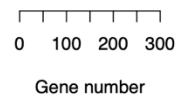

**Supplementary Figure 18.** Number of DEGs identified in each single cell cluster for each treatment condition against DMSO. GW30: GW3965 30 nM, GW300: GW3965 300 nM, T30: T0901317 30 nM, T100: T0901317 100 nM.



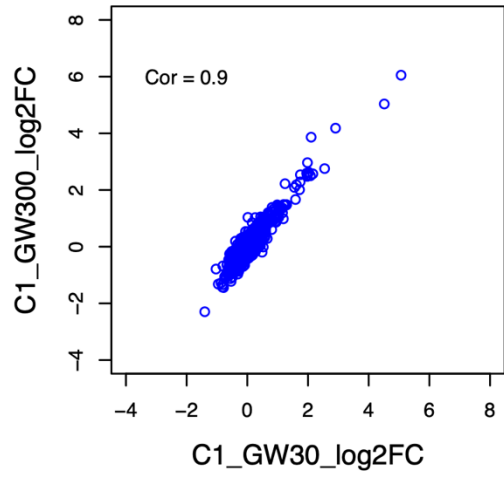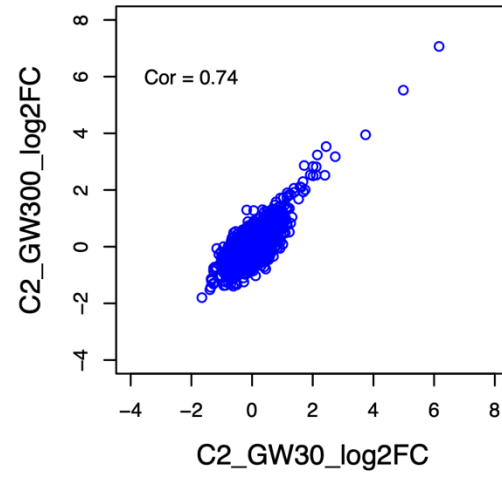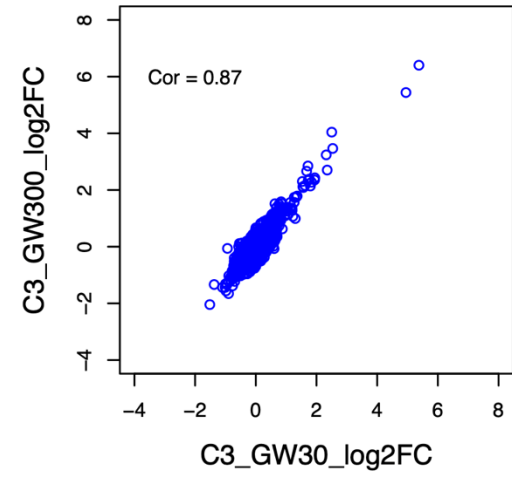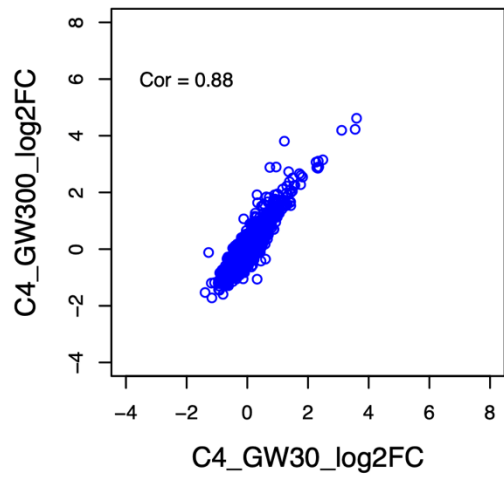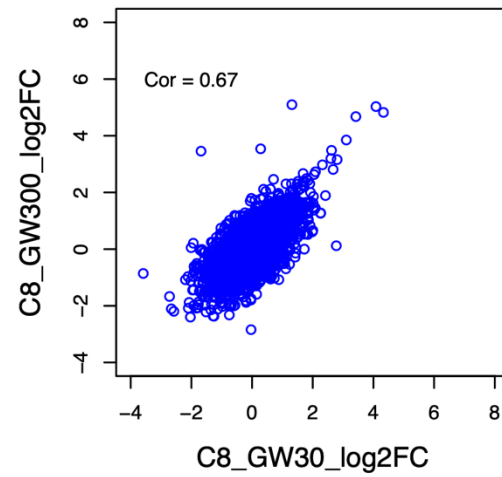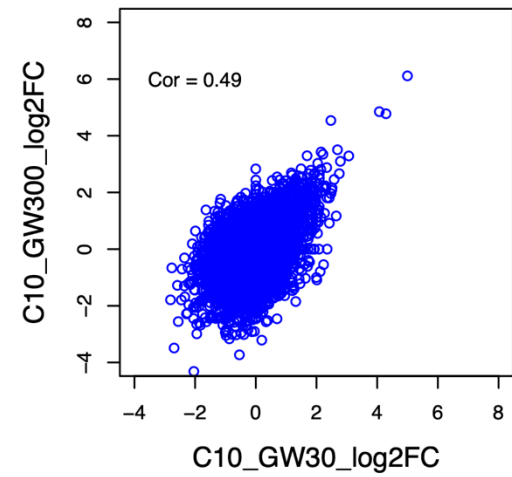

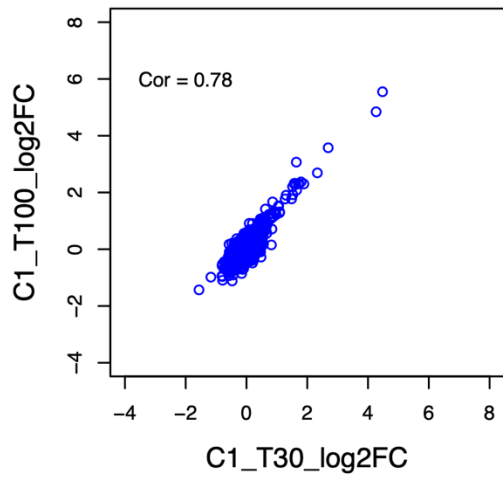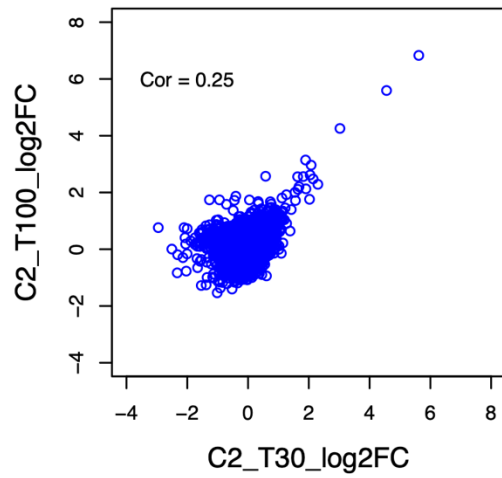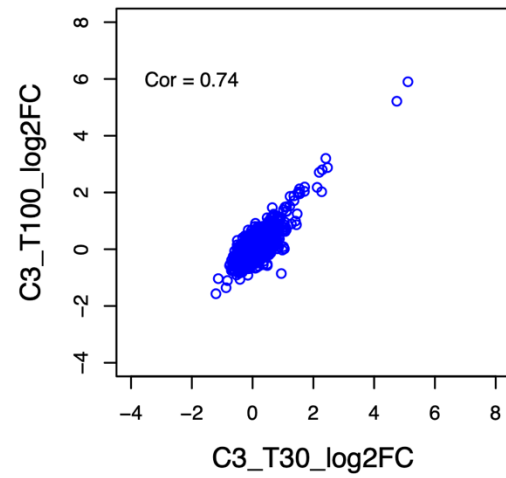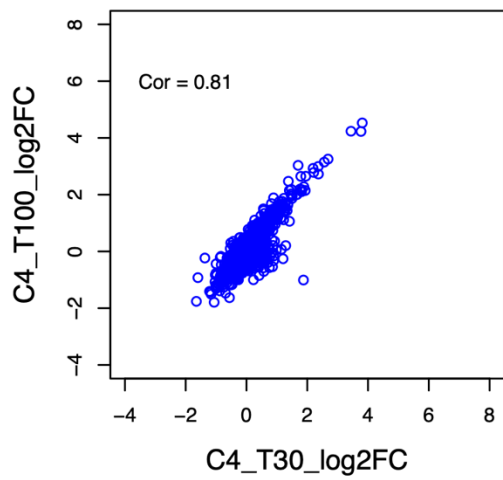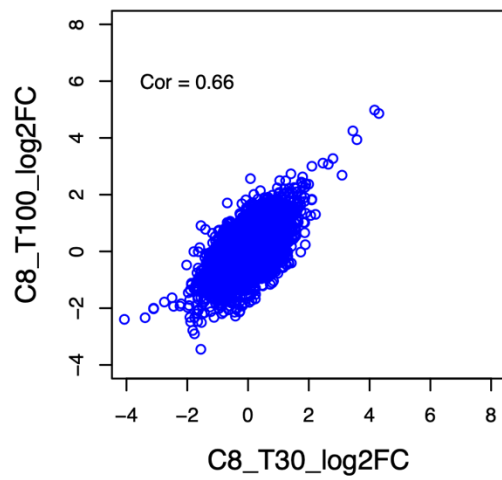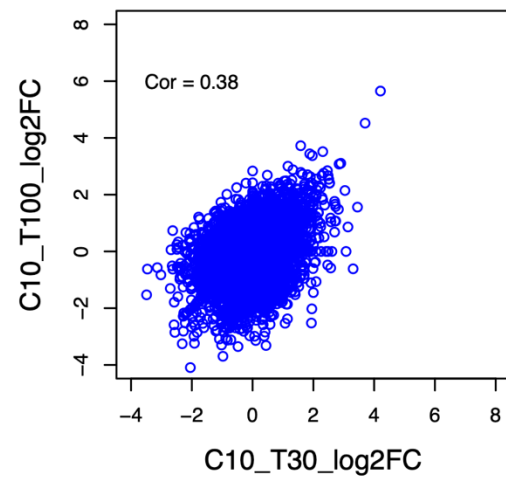

**Supplementary Figure 19.** Correlation of gene fold changes between the low and high dose of each treatment within the same single cell cluster. Pearson's correlations are shown. GW30: GW3965 30 nM, GW300: GW3965 300 nM, T30: T0901317 30 nM, T100: T0901317 100 nM.

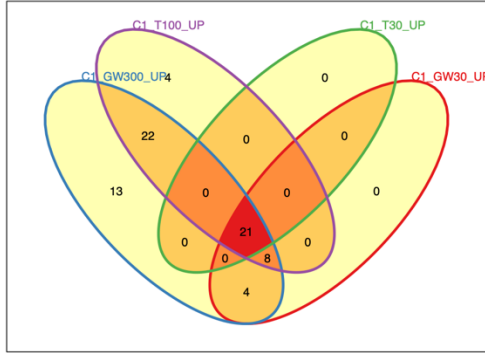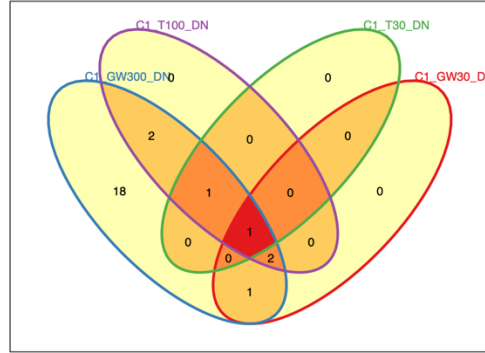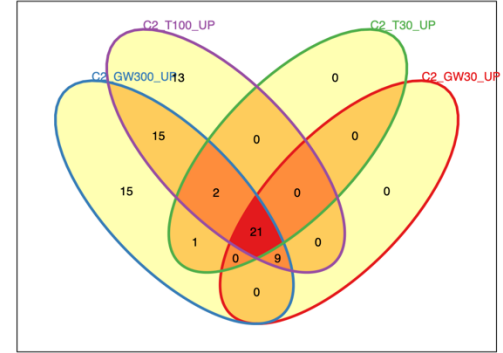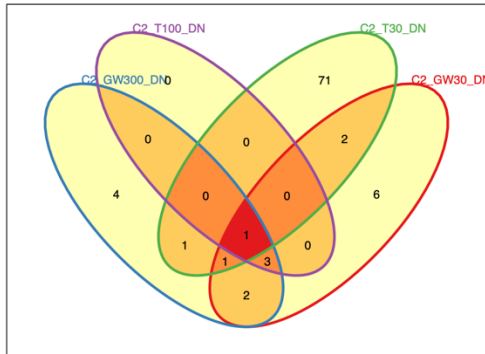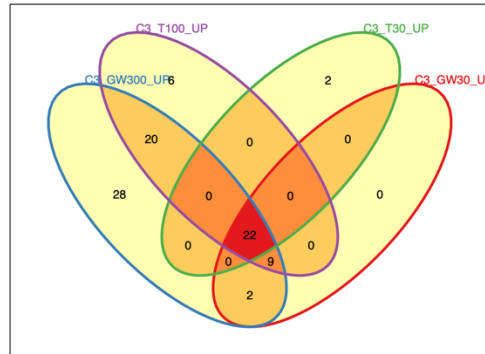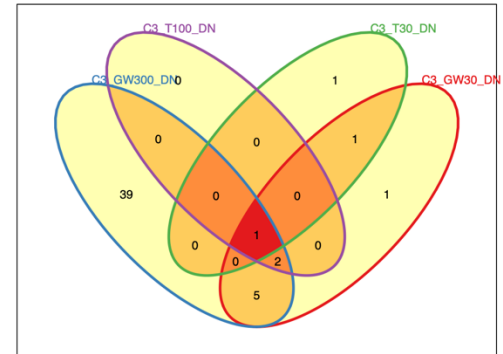

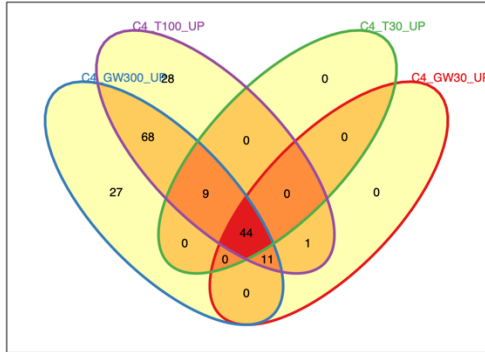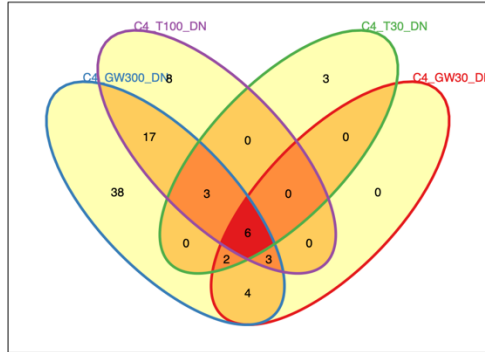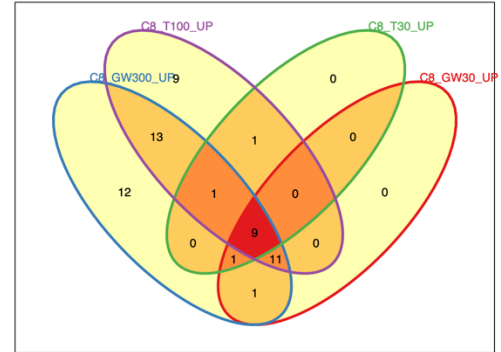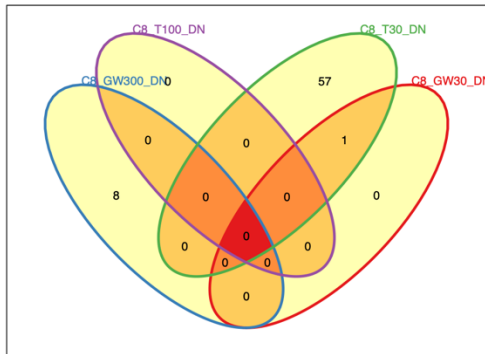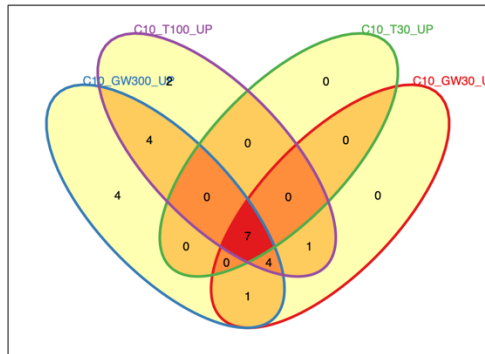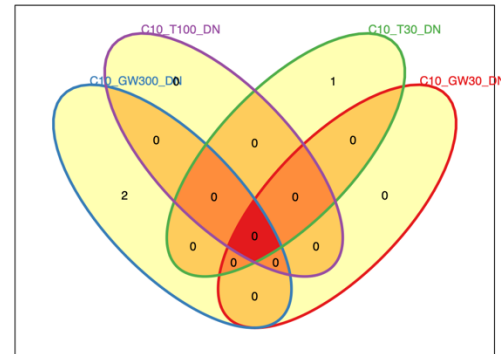

**Supplementary Figure 20.** Overlap in DEGs identified in each treatment within the same single cell cluster. UP: upregulated in the treatment compared to DMSO, DN: downregulated in the treatment compared to DMSO. GW30: GW3965 30 nM, GW300: GW3965 300 nM, T30: T0901317 30 nM, T100: T0901317 100 nM.

**GW3965 30nM vs DMSO**

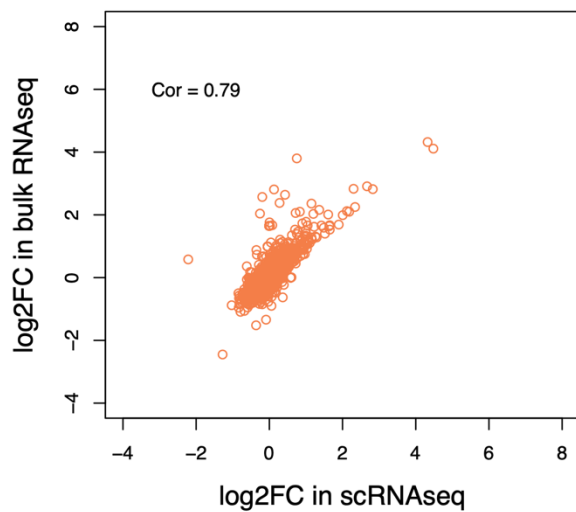

**GW3965 300nM vs DMSO**

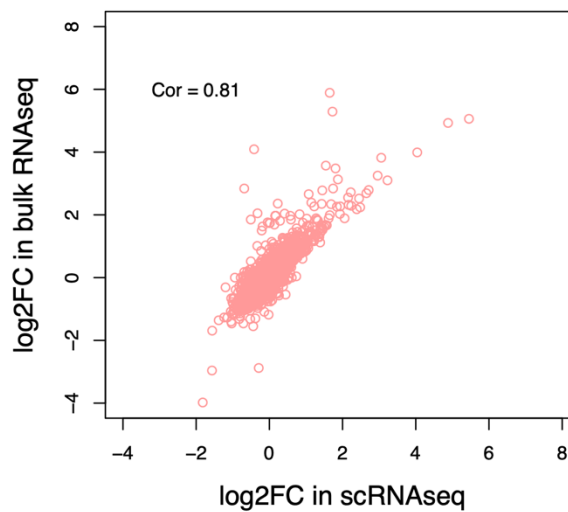

**T0901317 30nM vs DMSO**

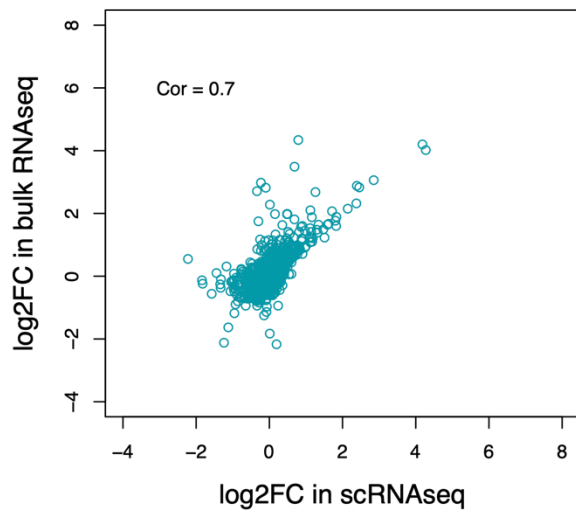

**T0901317 100nM vs DMSO**

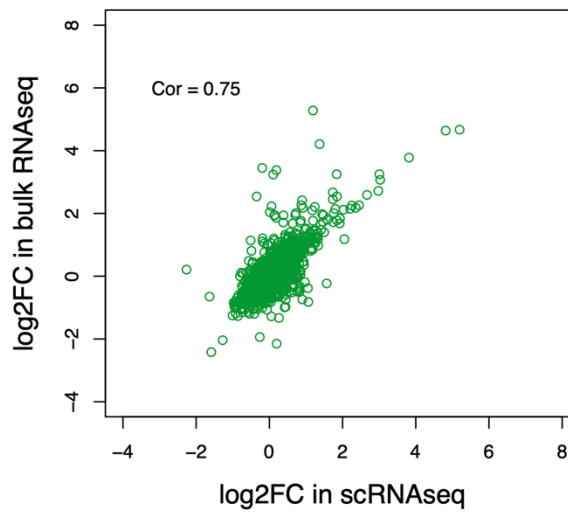

**Supplementary Figure 21.** Correlation of gene fold changes between bulk and single cell RNA-seq for each treatment. Single cell fold changes were calculated using the mean expression across all single cells associated with a treatment compared to the mean expression across all single cells associated with DMSO. Pearson's correlations are shown.



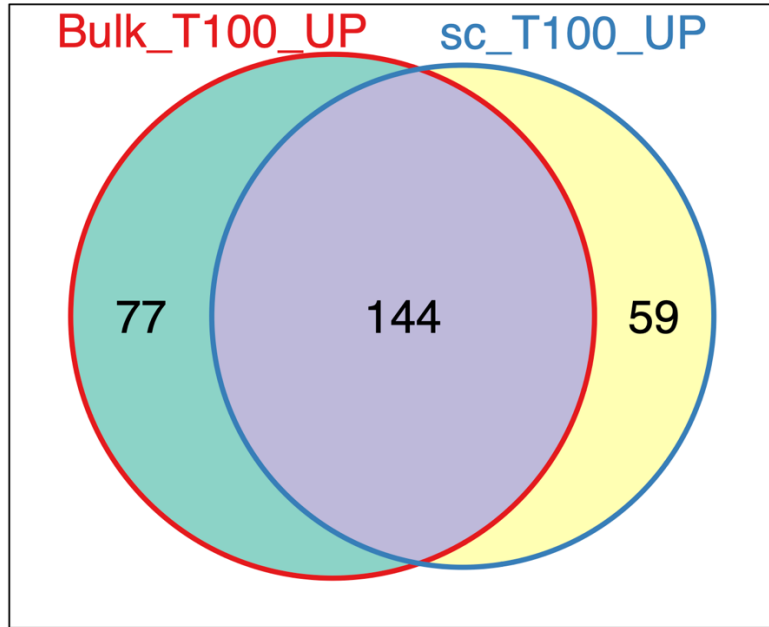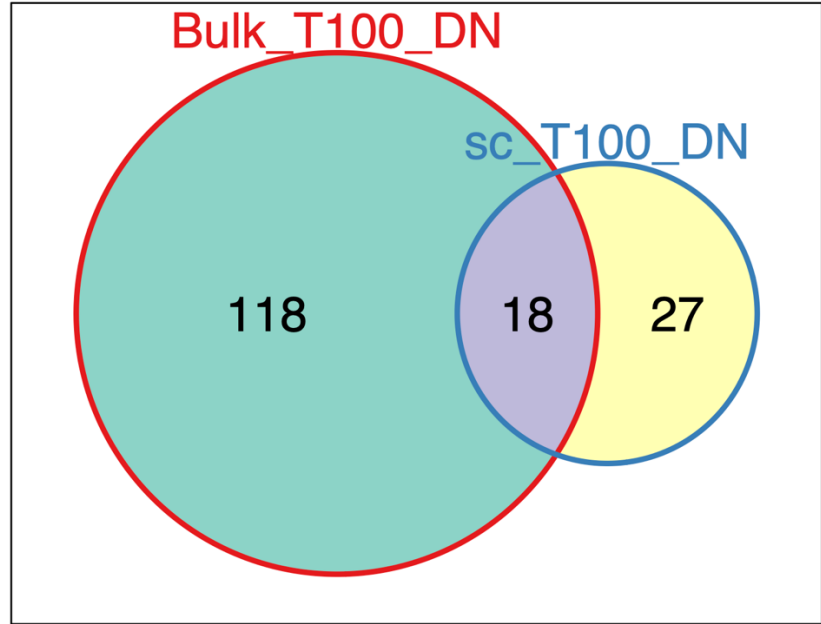

**Supplementary Figure 22.** Overlap in upregulated (UP) and downregulated (DN) DEGs between bulk RNA-seq and the union of single cell RNA-seq DEGs in clusters C1, C2, C3, C4, C8, and C10 with T0901317 100nM treatment. Bulk DEGs were filtered to genes tested in at least one single cell contrast.

**GW3965 300nM upregulated genes**

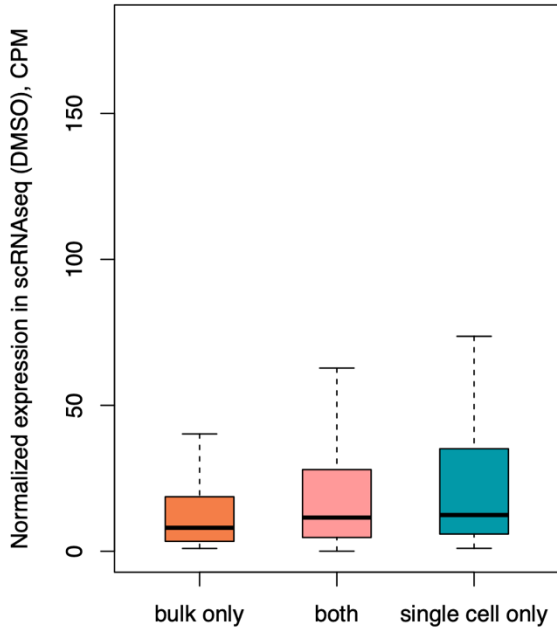

**T0901317 100nM upregulated genes**

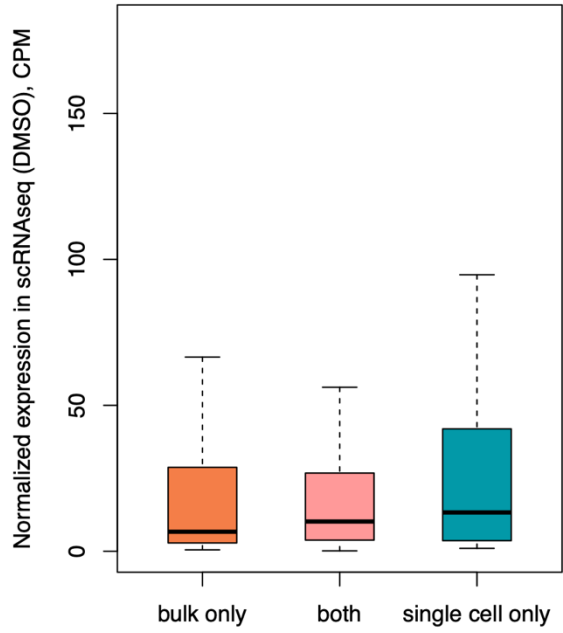

**GW3965 300nM downregulated genes**

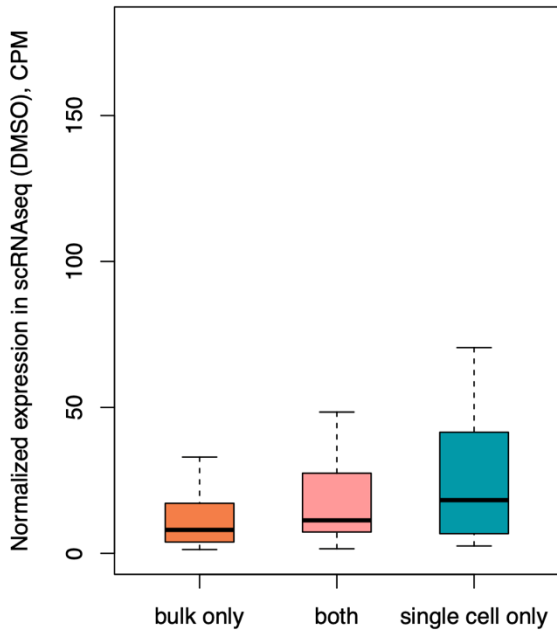

**T0901317 100nM downregulated genes**

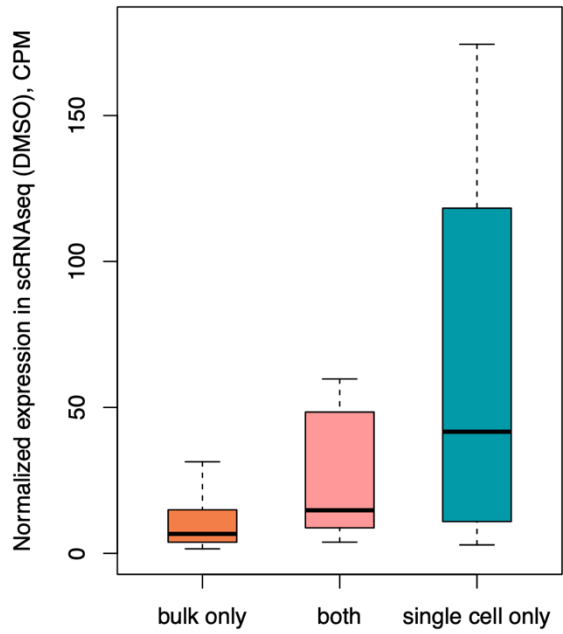

**Supplementary Figure 23.** Comparison of single cell expression levels in counts per million (CPM) for DEGs identified by bulk RNA-seq only, single cell RNA-seq only, or both methods for GW3965 300nM and T0901317 100nM treatments. Bulk DEGs were filtered to genes tested in at least one single cell contrast. For each gene, its single cell expression level was calculated as the mean expression across single cells in the DMSO samples.

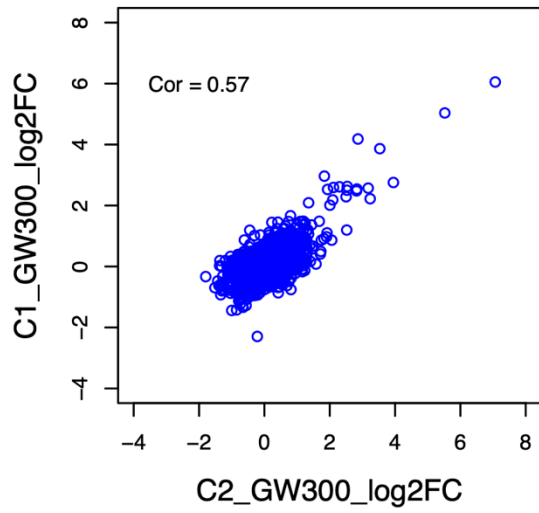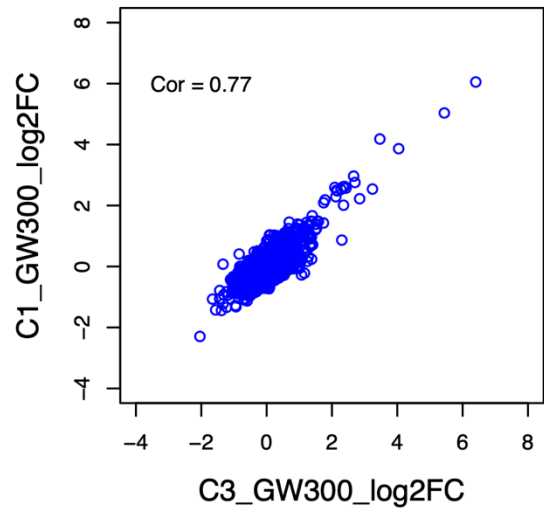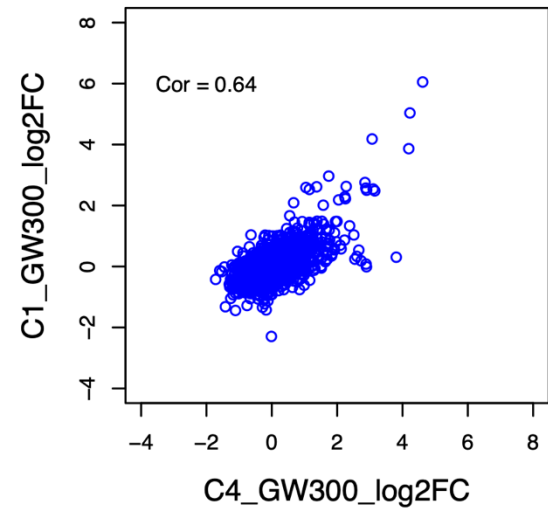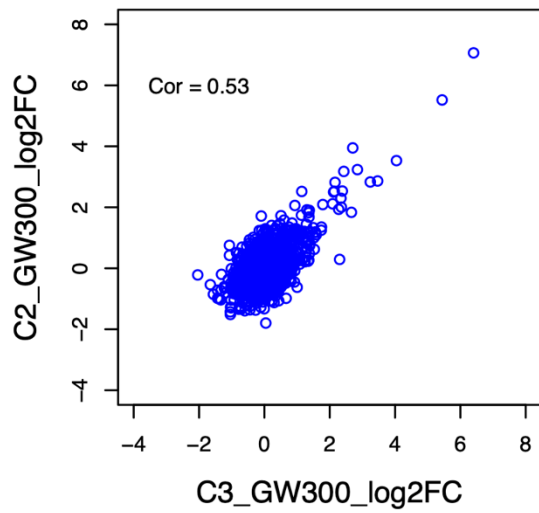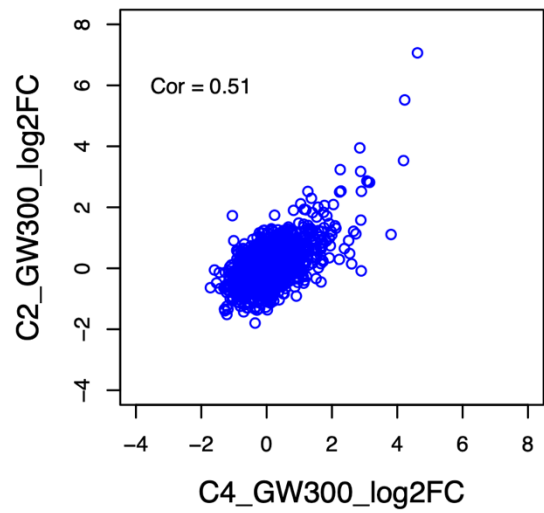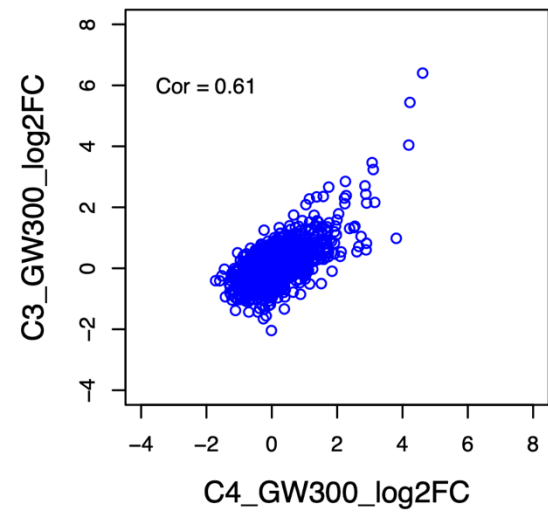

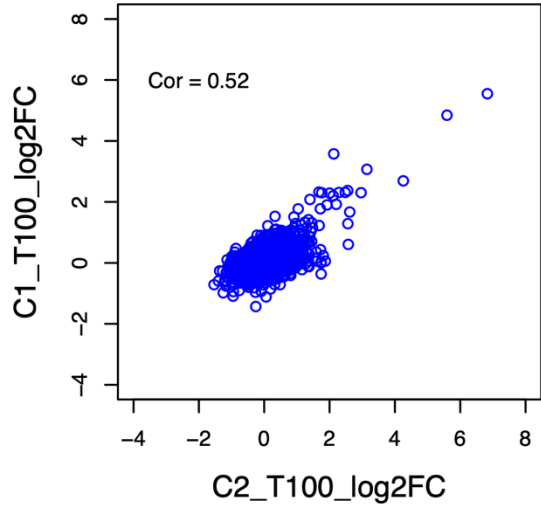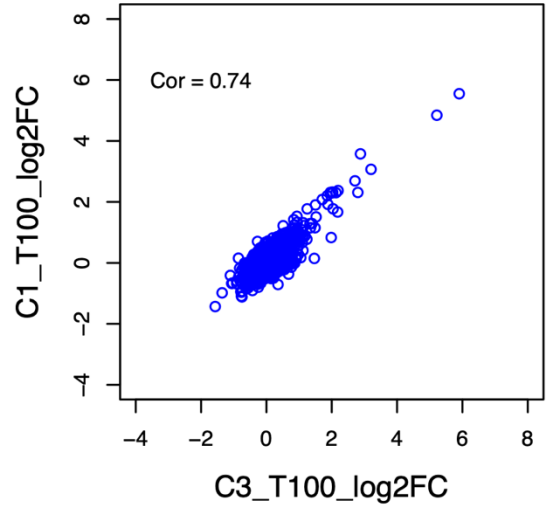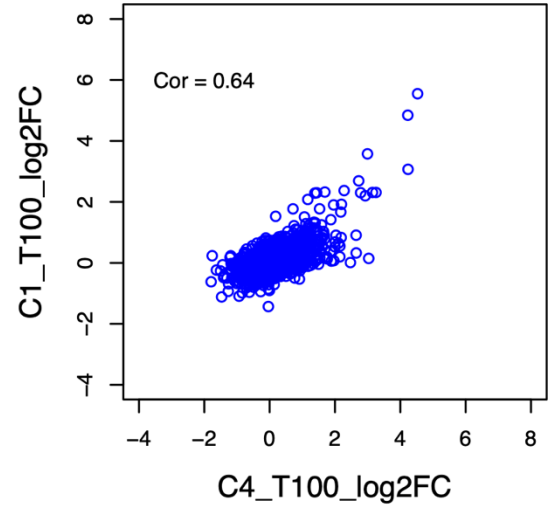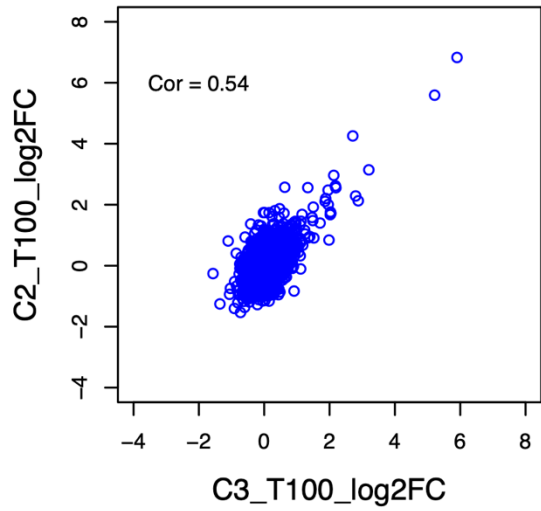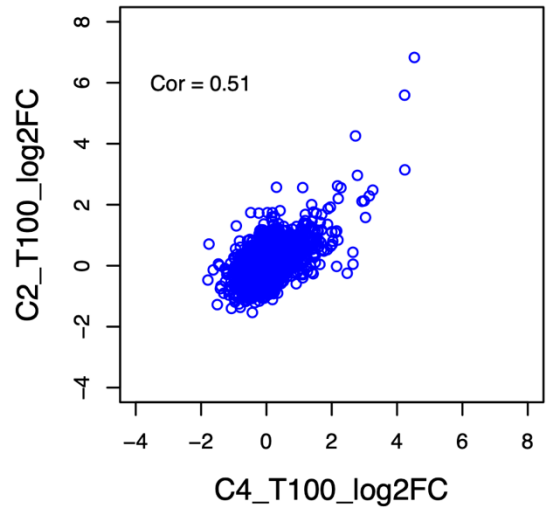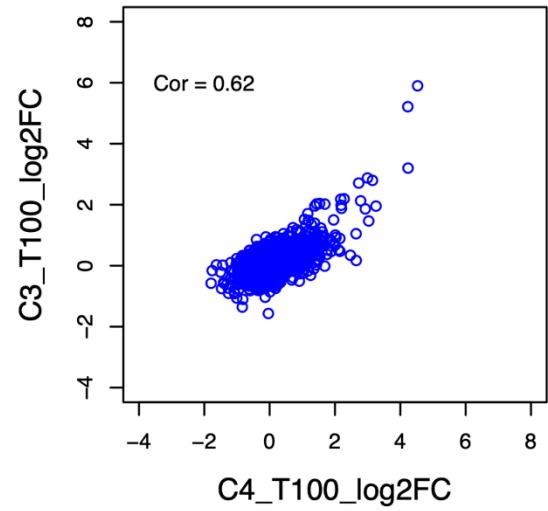

**Supplementary Figure 24.** Pairwise correlation of gene fold changes for the high doses of GW3965 and T0901317 across single cell clusters C1, C2, C3, and C4. Pearson's correlations are shown. GW300: GW3965 300 nM, T100: T0901317 100 nM.

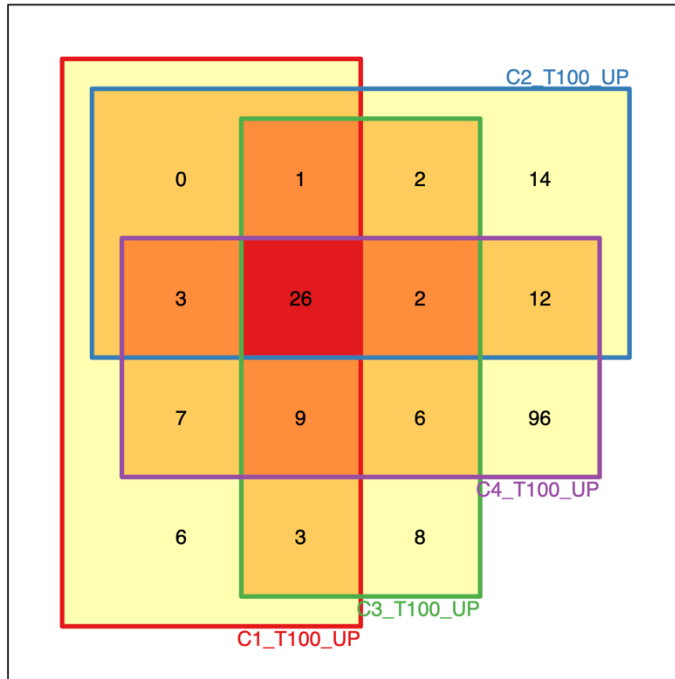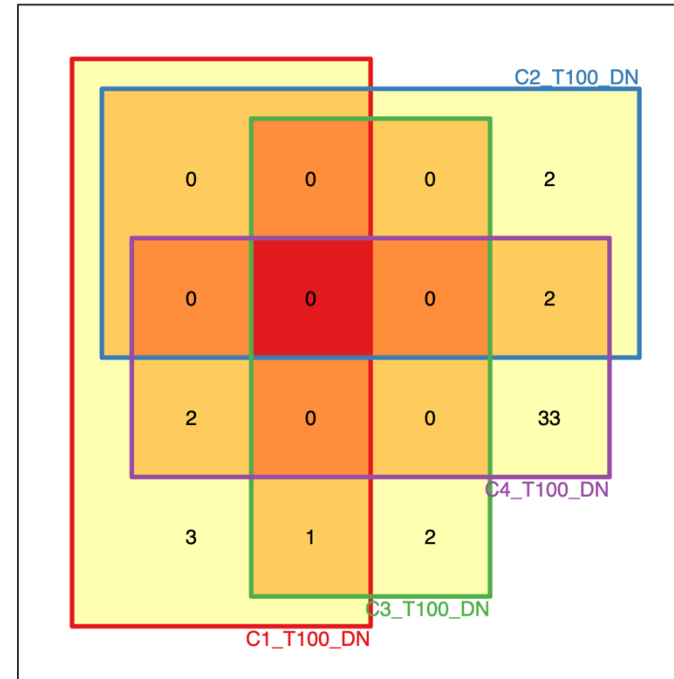



**Supplementary Figure 25.** Overlap in upregulated (UP) and downregulated (DN) DEGs for single cell clusters C1, C2, C3, and C4 with T0901317 100nM treatment (T100).
